# Supplementary material for: Characterisation of aerosol provenance from the fractional solubility of Fe (Al, Ti, Mn, Co, Ni, Cu, Zn, Cd and Pb) in North Atlantic aerosols (GEOTRACES cruises GA01 and GA03) using a two stage leach
Source: Copernicus journal article supplement (doi:10.5194/bg-2017-415), 2017-11-01
Supplement: Supplementary file [file bg-2017-415-AC4-supplement.pdf]

# Regional trends in the fractional solubility of Fe and other metals from North Atlantic aerosols (GEOTRACES cruises GA01 and GA03) following a two-stage leach

Rachel U. Shelley<sup>1,2,3</sup>, William M. Landing<sup>1</sup>, Simon J. Ussher<sup>2</sup>, Helene Planquette<sup>3</sup>, and Geraldine Sarthou<sup>3</sup>

<sup>1</sup>Dept. Earth, Ocean and Atmospheric Science, Florida State University, 117 N Woodward Ave, Tallahassee, Florida, 32301, USA

<sup>2</sup>School of Geography, Earth and Environmental Sciences, University of Plymouth, Drake Circus, Plymouth, PL4 8AA, UK

<sup>3</sup>Laboratoire des Sciences de l'Environnement Marin, UMR 6539 LEMAR (CNRS/UBO/IRD/IFREMER), Institut Universitaire Européen de la Mer, Technopôle Brest-Iroise, Plouzané 29280, France

*Correspondence to:* Rachel U. Shelley ([rshelley@fsu.edu](mailto:rshelley@fsu.edu))

**Abstract.** The fractional solubility of aerosol-derived trace elements deposited to the ocean surface is a key parameter of many marine biogeochemical models. Yet, it is currently poorly constrained, in part due to the complex interplay between the various processes that govern the solubilisation of aerosol trace elements. In this study, we used a sequential two-stage leach to investigate the regional variability in fractional solubility of a suite of aerosol trace elements (Al, Ti, Fe, Mn, Co, Ni, Cu, Zn, Cd and Pb) from samples collected during three GEOTRACES cruises to the North Atlantic Ocean (GA01, GA03-2010 and GA03-2011). We present aerosol trace element solubility data from two sequential leaches that provide a “solubility window”, covering a conservative, lower limit to an upper limit, the maximum potentially soluble fraction and discuss why this upper limit of solubility could be used as a proxy for the bioavailable fraction in some regions.

Regardless of the leaching solution used in this study (mild versus strong leach), the most heavily loaded samples generally had the lowest solubility. However, there were exceptions. Manganese fractional solubility was relatively uniform across the full range of atmospheric loading ( $32 \pm 13$  % and  $49 \pm 13$  % for ultra-high purity water and 25 % acetic acid leaches, respectively). This is consistent with other marine aerosol studies. Zinc and Cd fractional solubility also appeared to be independent of atmospheric loading. Although the average fractional solubilities of Zn and Cd (Zn:  $37 \pm 28$  % and  $55 \pm 30$  %, Cd:  $39 \pm 23$  % and  $58 \pm 26$  % for ultra-high purity water and 25 % acetic acid leaches, respectively) were similar to Mn, the range was greater, with several samples being 100% soluble after the second leach. Finally, as the objective of this study was to investigate the regional variability in TE solubility, the samples were grouped according to air mass back trajectories (AMBTs). However, we conclude that AMBTs are not sufficiently discriminating to identify the aerosol sources or the potential atmospheric processing effects that affect the physico-chemical composition and solubility of the aerosols.

## 39 **1. Introduction**

40 Aerosol trace element (TE) solubility is a key parameter of many biogeochemical models, but it is  
41 poorly constrained, e.g. Fe solubility estimates range from 0.001-90 % (Aguilar-Islas et al., 2010;  
42 Baker et al., 2016). The fractional solubility (herein referred to as “solubility”) of aerosol TEs is  
43 defined in terms of the amount of a TE in solution from any given leach that passes through a filter  
44 (usually < 0.45 or 0.2  $\mu\text{m}$ ), expressed as a percentage of the total (Baker and Croot, 2010; Baker et al.,  
45 2016; Jickells et al., 2016). While this operational definition accounts for some of the variability in  
46 published values, it does not account for all of it. A number of factors impact aerosol TE solubility,  
47 such as: (1) the choice of leaching protocol, and (2) the aerosol source, which in turn is impacted by a  
48 combination of factors such as the mineralogy of the particles, atmospheric processing during  
49 transport, and the presence/absence of emissions from e.g. vehicles, industry and agricultural  
50 practices. Several studies have concluded that the most significant effects on aerosol Fe solubility  
51 result from the source/composition of the aerosols, rather than changes in physico-chemical  
52 parameters, such as temperature, pH and oxygen concentration of the leach medium, or the choice of  
53 batch versus flow-through techniques (e.g. Aguilar-Islas et al., 2010; Fishwick et al., 2014).

54 There have been a number of studies that have focused on the role of aerosol TEs on biogeochemical  
55 cycles in the North Atlantic (e.g. Sarthou et al., 2003; Baker et al., 2013; Buck et al., 2010; Ussher et  
56 al., 2013; Powell et al., 2015). More recently, the GEOTRACES programme has produced a number  
57 of aerosol datasets, which has stimulated further discussion on the use of this data to look for trends  
58 that link TE solubility and aerosol source (e.g. Baker et al., 2016; Jickells et al., 2016). Elemental  
59 ratios, enrichment factors and air mass back trajectory simulations have long been used as a first  
60 approximation of aerosol source, and there are many studies that employ multivariate statistical  
61 analyses for aerosol source apportionment (e.g. Chueinta et al., 2000; Laing et al., 2015). In addition,  
62 more studies are making use of stable isotope ratios to investigate aerosol provenance. Some of these  
63 methods are well-established and have a relatively long history of use in this purpose, such as Pb  
64 isotopes (e.g. Maring et al., 1987), and Sr and Nd isotopes (e.g. Skonieczny et al., 2011; Scheuven et  
65 al., 2013 and references therein), and data from investigations of novel isotope systems are increasing.  
66 For example, Fe isotopes show promise as a way to differentiate between anthropogenic and mineral  
67 dust aerosols (Conway et al., submitted). In contrast, Cd isotopes may not be a suitable tool for aerosol  
68 source apportionment (Bridgestock et al., 2017).

69 As the soluble fraction of aerosol TEs are thought to be the most-readily bioavailable form of (Shaked  
70 and Lis, 2009), the leachable (soluble) fraction is used as a first approximation of the bioavailable  
71 fraction. Therefore, experimental conditions should mimic natural conditions as closely as possible,  
72 while yielding reproducible results. Ideally, the leach protocol used fits both these criteria. However,  
73 that is not always strictly possible for reasons such as access to the leach medium of choice,

74 availability of analytical instrumentation, and cost. Currently, however, there is no standardised  
75 aerosol leaching protocol, but it is recognised that this should be a priority for future studies (Baker et  
76 al., 2016). Some commonly-used leach media are ultra-high purity (UHP) water (18.2 MΩ.cm),  
77 seawater, weak acids (e.g. 1% HCl, 25 % acetic acid), or ammonium acetate buffer (e.g. Buck et al.,  
78 2006, Baker et al., 2006b; Berger et al., 2008).

79 To investigate the regional variation in the solubility of key TEs in North Atlantic, aerosol samples  
80 were collected during the US-GEOTRACES GA03 campaigns in 2010 and 2011, and the French  
81 GEOTRACES GA01 campaign in 2014 ([www.geotraces.org](http://www.geotraces.org)). The focus of this paper is Fe and the  
82 GEOTRACES “key” trace elements, Al, Cd, Cu, Mn, Pb, Zn, plus Co, Ni, and Ti (GEOTRACES  
83 Planning Group, 2006). This suite of TEs includes bioactive elements, tracers of atmospheric  
84 deposition, and elements characteristic of anthropogenic aerosols. Some TEs fit into more than one of  
85 these categories. Here, we use the term ‘trace element’ in the context of open ocean water column  
86 concentrations, thus acknowledging that elements such as Al, Fe and Ti are not present in trace  
87 abundances in aerosol source material. Aerosol concentrations for a suite of other elements (Li, Na,  
88 Mg, P, Sc, V, As, Se, Rb, Sr, Sn, Sb, Cs, Ba, La, Ce, Nd, Th, U) were also determined, but will not be  
89 discussed further here. However, these data are available at BCO-DMO (GA03; [www.bco-dmo.org/](http://www.bco-dmo.org/))  
90 and LEFE-CYBER (GA01; ([www.obsvlfr.fr/proof/php/GEOVIDE/GEOVIDE.php](http://www.obsvlfr.fr/proof/php/GEOVIDE/GEOVIDE.php)), and on request  
91 from the lead author.

92 In this study a two-stage leach protocol was followed. the first leach employed was the  
93 “instantaneous” leach described by Buck et al. (2006) which is a flow-through method where the leach  
94 medium is in contact with the aerosols for 10 - 30 s. It can be conducted using UHP water or seawater.  
95 The advantages of using UHP water are that UHP water is a reproducible medium (allowing for inter-  
96 lab comparisons) that can easily be analysed by ICP-MS for many elements simultaneously without  
97 the need for time-consuming sample handling steps such as separation techniques and drying down  
98 then re-dissolving the residue. Leaches with UHP water can be conducted at sea, or in the home  
99 laboratory. If fresh sea water is used the leaches must be undertaken at sea.

100 Given that UHP water and rain water have broadly similar pH (~ pH 5.6), UHP water is used as an  
101 analogue for rain/wet deposition, as wet deposition is thought to dominate the supply of many TEs, at  
102 least at some regional and local scales (Helmerts and Shremms, 1995; Kim et al., 1999; Powell et al.,  
103 2015). However, the extremely low ionic strength of UHP water, and the absence of the metal binding  
104 ligands naturally present in rain water and seawater (e.g. Chieze et al., 2012; Wozniak et al., 2014),  
105 means that UHP water is not a perfect analogue for oceanic receiving waters. As such, freshly-  
106 collected, filtered (< 0.2 μm) seawater likely produces a better estimate of the fractional solubility of  
107 TEs on first contact with oceanic receiving waters. For Fe, leaches using UHP water (~ pH 5.6)

typically produce higher solubility estimates than leaches conducted with natural seawater (~ pH 8.2) due to the pH sensitivity of dissolution and the higher ionic strength of sea water. On occasions where higher solubility in seawater is observed, complexation by Fe binding ligands is likely the cause. Regardless of whether UHP water or seawater is used, the instantaneous leach likely yields conservative lower limit estimates of TE solubility due to the short contact time between the aerosols and leach medium, and reports that aerosol solubility has a bi-modal behaviour for many TEs (initial fast release, followed by a slower sustained release with time; e.g. Desboeufs et al. 2005; Kocak et al., 2007; Mackey et al., 2015).

The second, sequential leach was employed in order to estimate an upper limit of TE solubility, and provide a “solubility window”, but also as an estimate of the maximum bioavailable fraction during the residence time of aerosol particles in the euphotic zone. We used the 25 % acetic acid leach with hydroxylamine hydrochloride described by Berger et al. (2008). The pH of this leach (pH 2.1) is just below that of zooplankton or fish digestive tracts and the reducing agent mimics the low oxygen environments inside faecal pellets and marine snow aggregates. Indeed, Schmidt et al. (2016) have demonstrated that lithogenic Fe is mobilised in the gut passage of krill resulting in threefold higher Fe content in the muscle, and fivefold higher Fe content of the faecal pellets of specimens close to lithogenic source material compared to those from offshore.

## 2. Methods

### 2.1. Aerosol sample collection

Aerosol samples (n = 57) were collected aboard the *R/V Knorr* during the *US-GEOTRACES GA03* cruises (15 Oct – 2 Nov 2010 and 6 Nov – 9 Dec 2011, and aboard the *N/O Pourquoi Pas?* during the French GEOTRACES GA01 cruise (GEOVIDE, 15 May – 30 June 2014) (Fig. 1). Both campaigns took place in the North Atlantic Ocean, with GA03-2010 and GA01 departing from Lisbon, Portugal. The cruise tracks were designed to traverse a wide variety of biogeochemical provinces (Longhurst, 2010) including; continental shelf regions, an eastern boundary current upwelling system (off West Africa), the oligotrophic North Atlantic gyre, and sub-Arctic waters, and to span a large gradient in atmospheric dust loading. The aerosol collections have been described previously (Wozniak et al., 2013; 2014; Shelley et al., 2015; 2017). Briefly, air was simultaneously pulled through twelve acid-washed 47 mm diameter Whatman 41 (W41) ashless filter discs at approximately  $1.2 \text{ m}^3 \text{ min}^{-1}$  ( $134 \text{ cm s}^{-1}$  face velocity) using a high-volume aerosol sampler (TSP model 5170V-BL, Tisch Environmental). The metadata and concentration data for the aerosol leaches can be found in the supplementary information (Table S1). All filters were stored frozen ( $-20^\circ\text{C}$ ) and double bagged prior to processing, both on the ship and upon returning to the home laboratories. To avoid contamination from the ship’s stack exhaust, aerosol sampling was controlled with respect to wind sector and wind speed using an anemometer interfaced with a datalogger (CR800, Campbell

Scientific). The samplers were programmed to run when the wind was  $\pm 60^\circ$  from the bow of the ship and  $> 0.5 \text{ m s}^{-1}$ . When the wind failed to meet these two criteria, the motors were shut off automatically and not allowed to restart until the wind met both the speed and direction criteria for 5 continuous minutes. In addition, the samplers were deployed on the ship's flying bridge as high off the water as possible (~14 m above sea level) to minimise collection of sea spray.

## **2.2. Trace element determination – totals aerosol TEs**

The total digestion method of Morton et al. (2013) was used for the determination of total aerosol TE loadings (Al, Ti, Mn, Fe, Co, Ni, Cu, Zn, Cd, Pb). The W41 filter discs were digested in tightly-capped 15 mL Teflon-PFA vials (Savillex). Firstly, 1000  $\mu\text{L}$  of ultrahigh purity (UHP) 15.8 M nitric acid (Optima or Merck ultrapur) was added to each vial, heated to  $150^\circ\text{C}$  on a hotplate, and then taken to dryness. Secondly, 500  $\mu\text{L}$  of 15.8 M nitric acid (13.2 M  $\text{HNO}_3$ ) and 100  $\mu\text{L}$  of 28.9 M hydrofluoric acid (5.8 M HF) (Optima or Merck ultrapur) was added to each vial, re-heated to  $150^\circ\text{C}$  on a hotplate, then taken to near dryness. After the final digestion and evaporation step, the samples were re-dissolved in 20 mL of 0.32 M nitric acid for analysis. All filter digestions were performed under Class-100 laminar flow conditions. Total aerosol TE concentrations were determined by magnetic sector field inductively coupled plasma mass spectrometry (ICP-MS; Thermo Element-2) at the National High Magnetic Field Laboratory (NHMFL) at Florida State University (FSU; GA03) or Pôle de Spectrométrie Océan (PSO) at the Institut Universitaire Européen de la Mer, France (IUEM; GA01). Samples were introduced to a PFA-ST nebuliser (Elemental Scientific Incorporated) via a modified SC-Fast introduction system consisting of an SC-2 autosampler, a six-port valve and a vacuum rinsing pump. Replicate blank solutions for the acid digestions were prepared by digesting W41 discs that had been deployed in the aerosol samplers for 1 h while not in operation, and the resulting concentrations were subtracted from all acid-digested filter samples. Details of the blanks and analytical figures of merit, including CRM recoveries, have previously been reported (Shelley et al., 2015; 2017).

## **2.3. Trace element determination – soluble aerosol TEs**

In this study, we used a two-step, sequential leach to investigate regional variation in aerosol sources, TE fractional solubility and bioavailability. We discuss the results from (1) an 'instantaneous' leach (Buck et al., 2006), that provides a lower limit estimate of the most labile TE fraction (analogous to the initial rapid release of TEs into rain drops and the surface mixed layer of the ocean ), followed by (2) a more protracted leach using 25 % acetic acid (with the reducing agent, hydroxylamine hydrochloride, and heat, 10 min at  $90^\circ\text{C}$ ), which mimics the slower and sustained release from aerosol particles during their residence time in the euphotic zone.

178 The first step, the “instantaneous” leach, was conducted under a Class-100 laminar flow hood. In this  
 179 technique, 100 mL of UHP water (> 18 MΩ.cm resistivity, pH ~5.5, Barnstead Nanopure) is rapidly  
 180 passed through an aerosol-laden W41 filter held in a polysulfone vacuum filtration assembly  
 181 (Nalgene). Operationally-defined dissolved ( $\leq 0.45 \mu\text{m}$ ) TEs are collected in the filtrate (leachate) by  
 182 positioning a GN-6 Metrice backing filter (cellulose esters) below the W41 disc in the filtration  
 183 assembly (Buck et al., 2006). In this study, the leachate was transferred to an acid-clean low density  
 184 polyethylene (LDPE) bottle and acidified to 0.024 M (~ pH 1.7) with UHP HCl and double-bagged for  
 185 storage until analysis at FSU or IUEM. As for total elemental determinations, soluble TEs in the  
 186 leachate were also determined by ICP-MS. Leachate blanks were prepared by passing 100 mL of  
 187 deionised water through W41 filters that had been deployed in the aerosol sampler for 1 h while not in  
 188 operation. For example, leachate blanks for Fe represented an average of  $1.6 \pm 0.4 \%$  and  $15.5 \pm 15.8$   
 189 % of the Fe sample concentrations for GA03 and GA01, respectively). A subset of samples (GA03-  
 190 2011) were also leached using the instantaneous leach procedure with freshly collected, filtered (0.2  
 191  $\mu\text{m}$ ) seawater as the leach medium. Leachate blanks were subtracted from all leachate sample  
 192 concentrations, details of which can be found in Table S1 in the Supplementary Material.

193  
 194 The fractional solubility was calculated using Eq. (1):

$$195 \quad \frac{[element]_{leach}}{[element]_{total}} * 100 = \text{Fractional Solubility} \quad (1)$$

196

197 Following the instantaneous UHP water leach, the filter was transferred to a 15 mL centrifuge tube,  
 198 and the second leach was undertaken, using 5 mL of 25 % (4.4 M) ultrapure acetic acid, with 0.02 M  
 199 hydroxylamine hydrochloride as the reducing agent (Berger et al., 2008). After a 10 min heating step  
 200 (90 °C), the leaches were left for 24 h before being centrifuged for 5 min at 3400xg. The leachate was  
 201 then carefully decanted into acid-clean LDPE bottles. In order to rinse any residual acetic acid from  
 202 the filter, 5 mL of UHP water was pipetted into the centrifuge tubes, which were then centrifuged  
 203 again for 5 min at 3400xg. This supernatant was then added to the acetic acid leachate in the LDPE  
 204 sample bottles. As this second leach aims to access a less labile fraction of the TEs of interest, without  
 205 significantly attacking TEs bound within the mineral matrix (Koçak et al., 2007; Berger et al., 2008), it  
 206 may provide an upper limit estimate for the fractional solubility of these aerosol TEs as the aerosols  
 207 mix down into the ocean. There is a slight risk that the heating step could begin to attack the mineral  
 208 matrix, resulting in a slight over-estimation of the upper limit of solubility, but this risk was shown to  
 209 be minimal (Berger et al., 2008). Despite this risk, the heating step was included because of the desire  
 210 for procedural similarity with marine particle leaches from the same cruises (e.g. Planquette et al.,  
 211 2016; H. Planquette and A. Gourain pers. comm.). This data has been used to show that for virtually  
 212 the whole GA01 transect atmospheric inputs of were not enough to sustain the water column

concentrations of Al, Fe and Pb (Menzel-Baraqueta et al., Tonnard et al., and Zurbrick et al., this issue).

As all samples in this study were leached first using the UHP water instantaneous leach, followed by a sequential leach with 25 % acetic acid, the overall solubility in 25% acetic acid was calculated using Eq. (2):

$$\frac{[element]_{UHP\ water\ leach}}{[element]_{total}} + \frac{[element]_{25\ \% \ HAc\ leach}}{[element]_{total}} * 100 = Fractional\ Solubility \quad (2)$$

## 2.4. Major anion determination

Before the UHP water leachate was acidified, a 10 mL aliquot was taken from each leach sample for the determination of the soluble major anions. The aliquot was immediately frozen for storage. The anions,  $Cl^-$ ,  $NO_3^-$  and  $SO_4^{2-}$ , were determined by ion chromatography using either a Dionex 4500i (at FSU for GA03 samples) or a Metrohm, IC850 system (at Laboratoire Interuniversitaire des Systèmes Atmosphériques, Paris for GA01 samples).

## 2.5. Air mass back trajectory simulations

Air mass back trajectory (AMBT) simulations were generated using the publicly-available NOAA Air Resources Laboratory Hybrid Single-Particle Lagrangian Integrated Trajectory (HYSPLIT) model, using the GDAS meteorology (Stein et al., 2015; Rolph, 2017). The 5-day AMBT simulations were used to describe five regional categories, based on the predominant trajectories for the air masses. The simulations and further details of these categories can be found in Wozniak et al., (2013; 2014) and Shelley et al., (2015; 2017). Briefly, for cruise GA03 air masses were characterised as European, North American, North African, or Marine (no or minimal interaction with major continental land masses within the 5-day simulation period). For cruise GA01, all the samples were classified as High Latitude dust (originating north of 50°N; Bullard et al., 2016). The classifications are shown in Table S1, and the AMBT simulations from Shelley et al. (2015; 2017) have been reproduced and can be found in the Supplementary Material (Fig. S1). The simulations use arrival heights of 50, 500 and 1500 m, so that at least one height was located in the marine boundary layer.

## 3. Results and Discussion

### 3.1. Identifying aerosol provenance

Air mass back trajectory (AMBT) simulations are frequently used to identify the origin and/or flow path of air masses, from which a first approximation of marine aerosol provenance (e.g. deserts, urban regions, or biomass burning) are made. While a useful tool in oceanographic studies, AMBTs used

alone do have limitations. Perhaps the most significant of these is that they are unable to quantify the contribution of different aerosol types or the amount of entrainment of particles emitted along the flow path of the air mass. Indeed, within the five categories described in this study multiple sources are likely to have contributed to the composition of the bulk aerosol of each category. This study is likely to be particularly sensitive to this as the sampling site was not static (i.e. sampling occurred along three different transects), and air masses can, and do, take different pathways within a general wind direction. Consequently, AMBTs are not adequately discriminating for aerosol source apportionment. However, we have organised the data using the AMBT categories as the objective of this study was to look for trends in solubility at a regional level, and also for consistency with our earlier published work from the North Atlantic (Wozniak et al., 2013; 2014; Shelley et al., 2015; 2017).

More powerful approaches for aerosol source apportionment consider the physico-chemical composition of the aerosols, either as the bulk aerosol or individual particles. There have been a number of field campaigns (e.g. DABEX, DODO, SAMUM and AMMA) and individual studies which have provided a wealth of information about the physico-chemical composition of African dust before, during and after long-range transport (e.g. Johansen et al., 2000; Johnson et al., 2008; McConnell et al., 2008; Petzold et al., 2009; Marticorena et al., 2010; Trapp et al., 2010; Formenti et al., 2011). These studies, and satellite data have identified the key dust source regions in North Africa (Prospero et al., 2002). Chemical composition data for other aerosol end members which supply aerosols to the North Atlantic is not as extensive, but some examples of individual studies and field campaigns can be found in Table S2. In addition, campaigns in the Atlantic Ocean which have sampled marine aerosols (e.g. Atlantic Meridional Transect, CLIVAR, GEOTRACES) have identified aerosol sources from characteristic groups of elements and elemental ratios (e.g. high concentrations of lithogenic elements are characteristic of a mineral dust, K is a tracer of biomass burning, and correlations between V and Ni are diagnostic of emissions from marine shipping; Baker et al., 2006a; Sippula et al., 2014; Baker and Jickells, 2017 ), organic composition (e.g. Wozniak et al., 2013; 2014, 2015), and/or stable isotopic signatures (Scheuvens et al., 2013 and references therein).

Although atmospheric inputs to the ocean are episodic and exhibit a seasonality in the tropical and subtropical North Atlantic that is largely driven by the migration of the intertropical convergence zone (Prospero et al., 1981; Adams et al., 2012; Doherty et al., 2014), North African/Saharan mineral dust dominated aerosol composition in the GA03 study region (Conway and John, 2014; Shelley et al., 2015; Conway et al., submitted). Other aerosol sources in Europe and North America and sea salt also contributed to the bulk aerosol to varying extents. In contrast to GA03, the GA01 transect was located north of the extent of the Saharan dust plume (~ 25° N in summer, Ben-Ami et al., 2009), and was thus influenced by a mixture of high latitude dust sources (Prospero et al., 2012; Shelley et al., 2017), which also have a seasonal cycle. As a result, a large dynamic range of aerosol loading was observed



281 (Fe = 0.185–5650 ng m<sup>-3</sup>; Al = 0.761– 7490 ng m<sup>-3</sup>) during these two campaigns, with the highest Fe  
282 and Al loadings associated with the North African samples (GA03), lower loadings with the Marine  
283 samples (GA03), and the lowest loadings observed in the samples collected in the Labrador Sea  
284 (GA01).

285 Total Fe and Al were strongly correlated ( $r^2 = 0.999$ , Pearson's  $p < 0.01$ ), demonstrating that the two  
286 metals have common lithogenic source(s) (Fig. 2). However, this correlation was largely driven by the  
287 heavily-loaded North African samples ( $r^2 = 0.997$ ,  $P < 0.01$ ). For each of the other source categories,  
288 simple linear regression of the data resulted in  $r^2$  values of: 0.879 ( $P < 0.01$ ) for High Latitude dust  
289 (GA01), 0.890 ( $P = 0.057$ ) for European samples (GA03), 0.983 ( $P = 0.34$ ) for N. American samples  
290 (GA03) and 0.751 ( $P = 0.70$ ) for Marine samples (GA03) (Fig. 2b). Further discussion of sub-regional  
291 differences in the Fe/Al ratio are addressed later in the Discussion. For the other TEs, strong  
292 correlations for the combined GA01 and GA03 datasets were found between Ti/Al ( $r^2 = 0.999$ ,  $P <$   
293  $0.01$ ), Mn/Al ( $r^2 = 0.994$ ,  $P < 0.01$ ) and Co/Al ( $r^2 = 0.996$ ,  $P < 0.01$ ), in accord with previous  
294 observations in this region owing to the primarily lithogenic sources of these elements (e.g. Jickells et  
295 al., 2016). The correlations between Al and the primarily anthropogenic TEs, Ni, Cu, Zn, Cd, and Pb,  
296 were also significant at the 99% confidence level : Ni/Al ( $r^2 = 0.884$ ), Cu/Al ( $r^2 = 0.652$ ), Pb/Al ( $r^2 =$   
297  $0.478$ ), Zn/Al ( $r^2 = 0.321$ ), Cd/Al ( $r^2 = 0.303$ ) due the presence of the heavily-loaded North African  
298 samples , which accounted for between 88 % and 30 % of the statistical variance for Ni and Cd,  
299 respectively. Sources other than mineral dust (e.g. metal smelting emissions, fly ash, vehicle  
300 emissions, volcanic ash, proglacial till) are presumably responsible for the residual variance.  
301 Establishing the contribution of these other sources and the impact on TE solubility is a research  
302 priority.

303 As the aerosol source has a direct bearing on the type and composition of aerosols, determining the  
304 source could provide useful data that might be used to predict the fractional solubility of aerosol TEs.  
305 As positive matrix factorisation (PMF) can be used for source apportionment, we used the USA  
306 Environmental Protection Agency EPA PMF model (v. 5.0) with the total TE concentration data to  
307 look for trends in the data. However, the GA01 and GA03 dataset is relatively small ( $n = 57$ ) and the  
308 model was not stable with more than two factors. The two factors were a mineral dust factor (high  
309 contributions from lithogenic TEs, in particular Al, Ti, Fe and Zr) and a pollution/anthropogenic factor  
310 (with high contributions from Zn and Pb) (Fig. S2a, Supplementary Material). As anticipated, the  
311 mineral dust factor dominated where North African aerosols were sampled, and the pollution factor  
312 was relatively more important closer to the European and North American continents (Fig. S2b). This  
313 is in accord with the samples from North Africa having elemental mass ratios that are consistently the  
314 closest to the UCC elemental ratios compared to aerosols from the other source regions (Fig. 3). In  
315 the High Latitude samples, the pollution factor and the mineral dust factor were of approximately

equal dominance. Interestingly, the North African aerosols also contained a relatively strong pollution component, consistent with a northeast flow into North Africa from Europe, followed by entrainment of mineral dust during passage over the Sahara (Baker and Jickells, 2017). Given that the PMF indicates that 100 % of the variability in the Cd concentrations was explained by the pollution factor, this suggests that Cd in North African aerosols is not sourced from mineral dust, which would explain why no fractionation was observed in Cd isotopes from North African and European aerosols (Bridgestock et al., 2017). Further, it also suggests that even the relatively homogeneous aerosols from North Africa do not represent a ‘pure’ end-member. However, the PMF analysis was not sensitive enough to identify the full complement of aerosol sources contributing to the samples collected during GA01 and GA03.

### 3.2. Elemental mass ratios and aerosol source

Elemental mass ratios from the ten most heavily loaded GA03 North African aerosols were averaged to derive a value for the ‘North African’ ratio depicted by the dashed horizontal line in Figures 3(a-i). Aluminium was used to normalise the data (Fig. 3; Table S2) and was chosen instead of Ti, another proxy for mineral dust, due to the presence of some anomalously high Ti/Al ratios in some of the Marine samples during GA03 (Fig. 3a; Shelley et al., 2015). We have previously reported a mass ratio of 0.76 for Fe/Al for the North African end-member aerosols (Shelley et al., 2015; Fig. 2a), which is significantly higher than the mean upper continental crustal (UCC) ratio of 0.47 (Rudnick and Gao, 2003) but entirely consistent other studies of Saharan soils and dust (e.g. Chiapello et al., 1997; Guieu et al., 2002; Lafon et al., 2006; Baker et al., 2013).

For North African dust there does not appear to be a discernible source dependent trend in Fe/Al ratios due to a natural variability in Fe-bearing minerals in soils in dust source regions (Lafon et al., 2006; Scheuven et al., 2013), but it might be possible to use Fe/Al ratios for some of the other aerosol groups to suggest different sources. For example, the European samples ( $n = 4$ ) fall into two sub-groups: two samples have low Fe/Al ratios (Fig. 2; E3 = 0.48, E4 = 0.10 and Fig. 3c), whereas the other two samples (E1 = 0.95 and E2 = 0.78) have Fe/Al ratios within the range of the North American samples (Fe/Al  $1.1 \pm 0.22$ , range 0.86-1.42) and all but one of the Marine samples (Fe/Al, excluding M12,  $0.93 \pm 0.33$ , range 0.59-1.61; M12, collected closest to the North African samples, Fe/Al = 0.43).

Aerosols from the more northerly section, GA01, were largely outside the influence of the Saharan dust plume (Shelley et al., 2017), and are all classified as High Latitude in this study (Fig. 3). For this group of samples, there were also sub-groups of Fe/Al ratios. During the first half of the cruise (Fig. 1), there was a group of samples (G1-6, G8 and G10) with Fe/Al ratios of  $0.58 \pm 0.05$ ; Fig.3c). This is intermediate between the UCC ratio ( $0.48 \pm 0.07$ ) and the North African mineral dust ratio ( $0.78 \pm$

0.03; Fig. 3c). For these samples, the wind direction was predominantly from the north/north west (Shelley et al., 2017), so it is unlikely that the observed ratios reflect a mixture of North African mineral dust and European aerosols. Rather, it is more likely comes from high latitude sources, as dust supplied by proglacial till from Iceland and Greenland peaks in spring/early summer, and can be deposited over the Atlantic Ocean (Prospero et al., 2012; Bullard et al., 2016), although the extensive cloud cover experienced during the GA01 cruise (May/June 2014) prevented the use of satellite observations (e.g. <http://worldview.earthdata.nasa.gov>) which would have confirmed the presence of dust from these sources. The elemental ratios calculated from TE concentrations from volcanic ash sampled during the eruption of the Eyjafjallajökull volcano in 2010 (Achterberg et al., 2013) offers some limited support for this argument, as our range of elemental ratios encompasses this end-member (Icelandic soils are almost exclusively volcanic in origin; Arnalds 2004). However, although Icelandic sands (Baratoux et al., 2011) and tephra (Oladottir et al., 2011) have Mn/Al ratios that overlap the GA01 samples, Fe/Al is generally lower in our High Latitude dust samples (Table S2).

A second group of GA01 samples (G7, G9, G11 and G12) had Fe/Al ratios of  $0.34 \pm 0.01$ , but no obvious link in terms of the AMBTs. The Greenland shelf and Labrador Sea samples, except G15, had low Fe/Al ( $0.16 \pm 0.04$ ), and were distinct from those collected on the Canadian shelf ( $0.48 \pm 0.02$ ). These trends strongly suggest that the High Latitude dust is made up of at least four aerosol sources.

While there is evidence for anthropogenic source(s) of aerosol Fe to the North Atlantic (Conway et al., submitted), which is more soluble than Fe associated with mineral dust (Sedwick et al., 2007; Sholkovitz et al., 2009; 2012), North African mineral dust dominates the supply of Fe to much of the study region (Baker et al., 2013; Shelley et al., 2015; 2017; Conway et al., submitted). In addition to the samples classified as European and North American, elevated Fe/Al ratios were also observed in the Marine samples (Fig. 2b). In addition to aerosols derived from continental sources (meaning either mineral dust or anthropogenic emissions), sea spray aerosols could make a relatively higher contribution to the bulk aerosol in remote oceanic locations (de Leeuw et al., 2014). However, this would have the opposite effect as the ratio of Fe/Al in surface seawater ( $0.017 - 0.024$  in the North Atlantic gyre,  $0.019$  European continental shelf, and  $0.030 - 0.031$  in the Mauritanian upwelling zone; Hatta et al., 2015) is two orders of magnitude lower than the crustal ratio. Hence the contribution of sea spray aerosols appears to have a negligible impact on the Fe/Al ratios in the bulk Marine aerosols.

The Marine, and the High Latitude samples had the widest range in Fe/Al ratios and were also collected in the most remote locations. These groups also had the greatest difference in the Fe/Al ratio between the total and soluble fractions, and also contained the samples with the lowest ratios of Fe/Al in the soluble fraction (minimum Fe/Al =  $0.15$ , samples G9-GA01 and M3-GA03; Fig. 3c), suggesting that even though aerosol Fe is altered towards more soluble forms during atmospheric transport

(Longo et al., 2016), atmospheric processing renders Al even more soluble relative to. However, although the soluble ratio of Fe/Al was the same for samples G9-GA01 and M3-GA03, the fractional solubility for Fe differed from 20 % for G9-GA01 to 0.8 % for M3-GA03. We suggest North African mineral dust was contributing to the composition of M3-GA03, resulting in the low solubility of Fe compared to G9-GA01. This suggestion is supported by isotopic evidence (Conway et al., submitted). For the anthropogenically-derived TEs, Ni, Cu, Zn, Cd and Pb (Figs. 3e-i) and for at least some of samples of the mixed-source TEs (i.e. having crustal and pollution sources; e.g. Mn and Co in Figs. 3b and d), there is some degree of source-dependence in the elemental ratios, with some significant increases from the UCC mass ratios in the total (Shelley et al., 2015) and UHP water soluble fractions (Fig. 3). The higher ratios of the UHP water soluble fraction compared to the total indicates that these TEs are more labile than Al. In addition, studies that have investigated the size distribution of aerosols have found that anthropogenically-derived TEs tend to be associated with fine mode aerosols ( $< 1 \mu\text{m}$  diameter), which are more soluble than coarse mode aerosols due to the larger surface area to volume ratio (Duce et al., 1991; Baker and Jickells 2006; Baker and Jickells, 2017). Size fractionated samples were collected during the GA03 cruise, and the smaller size fractions were indeed more soluble than the larger (Landing and Shelley, 2013). Enrichment of TEs with predominantly anthropogenic sources accords with other studies in the North Atlantic, and is most striking for aerosols that did not originate from the sparsely-populated, arid regions of North Africa (e.g. Buck et al., 2010; Gelado-Cabellero et al., 2012; Patey et al., 2015; Shelley et al., 2015).

403

### 404 **3.3. Aerosol solubility**

#### 405 **3.3.1. Solubility of aerosol TEs as a function of total concentration: UHP water (instantaneous)** 406 **compared to 25 % acetic acid leaches**

407 The UHP water soluble fraction of aerosol Fe and Al determined for all the North Atlantic GA01 and  
408 GA03 samples varied by two orders of magnitude (Fig. 4a: Fe = 0.14 - 21 %, median 2.2 %; Al = 0.34  
409 - 28 %, median 2.7%). Although a broader range of Fe and Al solubility was observed in this study,  
410 both these results and those reported by Buck et al. (2010) using the same approach (Fe = 2.9 - 47%,  
411 median = 14%, and Al = 3.7 - 50%, median = 9.5%) broadly agree that the median UHP water soluble  
412 fractions of Fe compared to Al in the North Atlantic are similar. While there was considerable overlap  
413 in the ranges of fractional solubility of TEs in aerosols from the different regions (e.g. Fe: European  
414 1.9 – 21 %; N. American 0.84 – 8.8 %; Marine 1.7 – 18 %; High Latitude dust 1.9 – 20 %), the North  
415 African samples, identified by their orange colour, high Fe and Al loadings, and definitive AMBTs)  
416 formed a distinct cluster of very poorly soluble Fe, or Al ( $< 1\%$ ; Fig. 4a). However, the solubility of  
417 the North African ('Saharan') aerosol Fe was 1 – 2 orders of magnitude lower in this study (0.14 –  
418 0.57 %) than during the Buck et al. (2010) study (2.9 – 19 %). This supports the hypothesis that TEs

419 from North African aerosols sampled with a higher frequency, closer to source (as in this study) are  
420 less soluble as a result of a lesser degree of atmospheric processing and/or larger particle sizes (Baker  
421 and Jickells, 2006; Longo et al., 2016).

422 The inverse relationship between total aerosol loading and fractional solubility has previously been  
423 reported for Fe (Sholkovitz et al., 2009; 2012; Jickells et al., 2016) and Al (Jickells et al., 2016).  
424 Jickells et al. (2016) compiled solubility data from the North Atlantic and found that the general trend  
425 between Fe and Al solubility and atmospheric loading was robust over the range of atmospheric  
426 loadings found in the North Atlantic, regardless of the leach protocol employed. In this study, both the  
427 UHP soluble, and 25 % acetic acid soluble fractions of Fe and Al (Figs 4a and b) were related to  
428 atmospheric loading, i.e. the highest loaded North African samples had the lowest solubility. The  
429 possible exception to this trend is the fraction of Al that dissolved from North African aerosols  
430 following the 25 % acetic acid leach (Fig. 4b). However, it could simply be that we are observing  
431 scatter in our data, which is smoothed out in the larger dataset ( $n > 2000$ ) examined by Jickells et al.  
432 (2016). Although, we cannot rule out that this effect is the result of the heating step in the 25 % acetic  
433 acid leach attacking the alumino-silicate matrix. Further experimentation with and without the heating  
434 step would help to resolve this issue.

435 For most of the other TEs investigated here (Ti, Co, Ni, Cu, Zn, Cd and Pb; Fig. 4a), the same general  
436 trend as Fe and Al was observed following the UHP water leach. For the 25 % acetic acid leaches  
437 (Fig. 4b), Ti, Ni, Cu and Pb solubility decreased with an increase in atmospheric loading, but the trend  
438 was less clear for Co. For Co the inverse relationship between UHP water solubility and loading was  
439 not observed when using the 25 % acetic acid leach, most likely because Co may be associated with  
440 the Mn and Fe oxides that are easily reduced using this leach. In contrast, Mn, Zn and Cd did not  
441 display the same inverse relationship as Fe and Al after either leaching step (Figs. 4a and b). This has  
442 previously been noted for Mn (Jickells et al., 2016). Although the average fractional solubilities of Zn  
443 and Cd (Zn:  $37 \pm 28$  % and  $55 \pm 30$  %, Cd:  $39 \pm 23$  % and  $58 \pm 26$  % for ultra-high purity water and  
444 25 % acetic acid leaches, respectively) were similar to Mn ( $32 \pm 13$  % and  $49 \pm 13$  % for ultra-high  
445 purity water and 25 % acetic acid leaches, respectively), the range was greater, with several samples  
446 from different regions (although not North Africa) being 100% soluble after the second leach.

### 447 **3.3.2. Solubility of TEs: UHP water (instantaneous) compared to 25 % acetic acid leaches**

448 All ten TEs from the five different provenances were less soluble in UHP water than 25 % acetic acid  
449 (Fig. 5). This is not a surprising finding given the lower pH of acetic acid compared with UHP water,  
450 that acetate is a bidentate ligand, and the longer contact time of the aerosols with the leach solution in  
451 the 25 % acetic acid leach procedure. In addition, there is some degree of source-dependent variability  
452 in the relative proportions of each TE that is released by the two leaches. In general, as with the

leaches with UHP water, the North African aerosols were distinctly less soluble than aerosols from the other source regions (Fig. 5). Figure 5 highlights the distinction between the lithogenic elements, Al, Fe and Ti (universally low solubility in UHP water, mostly < 20 %, and extremely low solubility of North African aerosols, < 1 %), and the anthropogenic, pollution-dominated elements, Ni, Cu, Zn, Cd and Pb (solubility up to 100 %). Manganese (Mn) and Co have both lithogenic and anthropogenic sources, so are classified as “mixed-source”, and have intermediate solubilities. Like all the TEs reported here, Mn solubility in UHP water was significantly less ( $p < 0.01$ , two-tailed, homoscedastic t-test) in North African aerosols (median solubility = 19 %) than in the non-North African samples (median = 38%), which seems to contrast somewhat with the findings of Baker et al. (2006b) and Jickells et al. (2016). However, in common with these earlier studies (Baker et al., 2006b; Jickells et al., 2016), there was no significant source-dependent difference in Mn solubility in 25 % acetic acid (non-North African samples:  $49 \pm 15\%$ , North African samples:  $49 \pm 6.4\%$ ).

### 3.3.3. Soluble TEs: UHP water compared to seawater instantaneous leaches

Seawater leaches were conducted on a subset of samples (GA03-2011), to investigate the suitability of seawater as the leach medium in the instantaneous leach (Fig. 6). During this study, Fe solubility in seawater was lower than in UHP water (Fig. 6c). This phenomenon has previously been observed in atmospheric aerosols from the North Atlantic Ocean (Buck et al., 2010). For Fe, only a few samples of North American and Marine provenance conformed to the relationship described by the equation proposed by Buck et al. (2010), with most of our data plotting above the regression line of the Buck et al. (2010) study (Fig. 6c), indicating that our data was relatively more soluble in UHP water compared to seawater than in this earlier study. One possibility is that the higher aerosol Fe loadings we observed during GA03-2011 (this study, maximum =  $5650 \text{ ng Fe m}^{-3}$ ), compared to the A16N-2003 transect (Buck et al. 2010; maximum =  $1330 \text{ ng Fe m}^{-3}$ ), resulted in a particle concentration effect (Baker and Jickells, 2006), whereby the relationship between aerosol Fe loading and fractional solubility breaks down because dust on the filter can be a source of soluble Fe but can also scavenge dissolved Fe from the sea water leach solution as it passes through the filter. Given that the link between Fe solubility in seawater and Fe-binding ligand availability is well established (e.g. Rue and Bruland, 1995; Gledhill and Buck, 2012), an alternative explanation for the difference in Fe solubility is that the organic composition of the seawater used as the leach mediums differed between the two studies.

Mn is the only TE that has a slope close to unity (0.98; Fig. 6b), suggesting that solubility estimates were not impacted by the choice of leach medium used. This is consistent with other studies that have found that Mn solubility is less sensitive to the choice of leach media, or to aerosol provenance than other TEs (Baker et al., 2006b; Jickells et al., 2016). Due to the large variability in the data set, there was no significant difference between Mn solubility in UHP water or seawater ( $32 \pm 13\%$  and  $24 \pm 17$

488 %, respectively; Fig. S3, and Tables S3 and S4, Supplementary Material). Table 1 shows which  
489 regions had slopes for UHP water versus seawater fractional solubility that did not differ significantly  
490 from 1.0 at the 95 % confidence level (t-statistic; Table S5). For the North American samples, the  
491 slope did not differ significantly from 1.0 for Al, Mn, Co, and Zn. For the Marine samples, the same  
492 was true for Al, Co and Zn, and for the North African samples this was the case for Al, Fe, Ni, Cu, Zn  
493 and Cd. Pb was the only TE with slopes differing significantly from 1.0 for all regions.

494 For Co and Pb (Figs 6d and i), most of the data falls below the 1:1 line, indicating that they were  
495 generally more soluble in seawater than UHP water. In contrast, the opposite trend was observed for  
496 Fe and Ni (Figs 6c and e), perhaps due to differences in the availability of metal binding ligands in the  
497 seawater used. A challenge of using seawater as the leach medium is that it is difficult to control for  
498 natural variability in the types and concentrations of organic ligands. Consequently, it is not possible  
499 to determine conclusively why contrasting trends in the fractional solubility of TEs were observed. For  
500 this reason, we advocate for the use of UHP water as a common leach medium to facilitate  
501 comparisons of solubility resulting from differences in aerosol composition. An additional benefit is  
502 the ease of analysis of UHP water compared to seawater.

503

### 504 **3.4. Visualising marine aerosol sources using multivariate statistical approaches**

505 As the PMF analysis was only able to identify two significant factors accounting for the total aerosol  
506 TE concentrations, another multivariate approach was taken. Hierarchical cluster analysis (Ward's  
507 method, Euclidian distance) was performed using the R statistical package (v. 3.3.0; R Core Team,  
508 2016) to look for trends in the data that might reveal the various aerosol sources. Hierarchical cluster  
509 analysis was performed on (1) log transformed total aerosol TE plus  $\text{NO}_3^-$  concentration data (Fig. 7a),  
510 and (2) log transformed TE fractional solubility plus  $\text{NO}_3^-$  concentration data (Fig. 7b). The  $\text{NO}_3^-$   
511 concentrations appear in both runs as we wanted to include TEs plus an indicator of anthropogenic  
512 pollution.

513 Figure 7a shows two main branches to the dendrogram of the total TE concentration data. One branch  
514 groups all the North African and European samples and two North American samples (N2 and N4)  
515 together, and the other branch groups all other samples together. Samples closest to each other are the  
516 most similar to each other, and those joined in the same groups share similar characteristics.  
517 Therefore, in this analysis, the North African samples are grouped together, as are the High Latitude  
518 samples. All but three North African samples form a distinct sub-group. The three remaining North  
519 African samples (A8, A9 and A11) share more characteristics with the European samples, lending  
520 support for mixing of aerosols from the two regions. Counterintuitively, the two European samples

with the lowest Fe/Al ratios (E3 and E4) are the ones that are most similar to the two North American samples, which have relatively high Fe/Al ratios of 0.90 and 0.87. The GA01 samples (with the exception of one sample, G15) form a distinct cluster, but with three sub-groups: one is the Greenland/Labrador Sea samples (without G15), and the other two are related to each other but distinct from the Greenland/Labrador Sea samples and are a mixture geographically of the other samples. However, there is a trend, the 'middle' group is the group of samples collected closest to land, the group to the right is the group of samples collected furthest from land. The other groupings are made up of a mixture of North American and Marine samples. This could suggest that the Marine samples are comprised predominantly of North American aerosols from more than one source. The only anomaly is the two N American samples that 'look European'.

Although there are differences between Figures 7a (total TEs) and 7b (fractional solubility), the general trend of an inverse relationship between TE atmospheric loading and fractional solubility holds, as the samples with the highest concentrations appear on the left in Figure 7a, and on the right in Figure 7b. In terms of fractional solubility, the N. African samples form a distinct cluster, but this cluster is made up of two sub-groups: one collected during GA03-2010 and one during GA03-2011. The samples from near Greenland and the Labrador Sea are also distinct from the other GA01 samples (again with the exception of G15), and also distinct from all other samples. The European samples, all other GA01 samples, and three North American samples form a loose cluster. The remaining North American samples and all the Marine samples form another loose cluster.

Plotting the data this way still does not allow us to identify the aerosol sources definitively, but it does allow us to visualise which samples have the most similar physico-chemical characteristics and confirms the general trend of a relationship between aerosol loading and fractional solubility and, by extension, bioavailability, even though we have demonstrated that this relationship is not present for all TEs. This knowledge is then useful as a general rule of thumb in biogeochemical models, although clearly other factors also exert controls on aerosol TE solubility. For example, during their investigations of the GA03 aerosols, Wozniak et al., (2013; 2014; 2015) proposed a role for water soluble organic carbon (WSOC) in controlling the solubility of Fe. Desboeufs et al. (2005) also found evidence for a link between total carbon and TE solubility in regions impacted by anthropogenic activity. Thus, both aerosol acidity and organic carbon content are implicated as controls on aerosol Fe solubility, but the relationship is frequently not linear.

### 3.5. Choice of leach protocol and modelling TE solubility



Furthermore, the ability of models to replicate subtleties in aerosol TE solubility may prove critical in forecasting ecosystem impacts and responses. Due to the magnitude of North African dust inputs to North Atlantic region, this is a particular challenge and is compounded by additional unknowns such as how aerosol acidity will be impacted by the combined effects of increasing industrialisation/urbanisation, and changes in the magnitude of future mineral dust supply and biomass burning (Knippertz et al., 2015; Weber et al., 2016). In other words, it is important to accurately constrain aerosol trace element solubility with high quality data in order to improve the predictive capacity of models. Clearly the choice of leach media and protocol impacts the measured fractional solubility. This is shown in both Figures 4 and 5 and has a number of implications with regard to modelling the impact of atmospheric deposition on marine biogeochemistry. For example, for elements with generally low solubility, such as Fe, the difference between 1 % and 2 % solubility is an increase of 100 %, meaning that only half the amount of dust is needed to yield the same amount of dissolved Fe. To complicate matters further, recent research has demonstrated that some diazotrophs are able to directly access particulate Fe (Rubin et al., 2011). The significance of this is that *Trichodesmium* are common in the North Atlantic gyre under the influence of the Saharan plume, and the North African dust samples have higher fractional solubility for Fe using the acetic acid leach. If *Trichodesmium* are able to access particulate Fe, as the study indicates (Rubin et al., 2011), our data suggests that twentyfold more aerosol Fe is available for uptake than is suggested from the instantaneous leach. This data suggests that in regions where *Trichodesmium* proliferate, we are likely to underestimate bioavailable Fe using the instantaneous approach.

There are implications for modelling the impact of atmospheric deposition for other TEs. Although, the lack of source dependent differences in Mn solubility in these aerosols makes modelling Mn solubility simpler, there was still a difference in the fractional solubility calculated from the two leaches (UHP water:  $32 \pm 13$  % and 25 % acetic acid:  $49 \pm 13$  %). However, for Al, there was a large range in solubility: 0.3 – 28 % using UHP water and 4.1 – 100 % using 25 % acetic acid. Both ranges far exceed the relatively narrow range used in the MADCOW model (1.5 – 5 %), which has been used to estimate atmospheric inputs based on dissolved Al concentrations in the mixed layer (Measures and Brown, 1996). It is noted, however, that the median values from this study fall within the range used by the MADCOW model (2.7 % and 3.3 % for UHP water and 25 % acetic acid, respectively). We highlight this issue to draw attention to some of the problems inherent in modelling TE solubility and its impact on the chemistry and biogeochemistry of the upper ocean.

Given that the different leaching approaches access different fractions of aerosol TEs (those TEs that are loosely bound to surfaces and TEs that are associated with less reactive phases), that can dissolve from aerosols at different rates (e.g. Kocak et al., 2007; Mackey et al., 2015), we need to conduct experiments that elucidate the relationship between the soluble and bioavailable fractions. In the

588 meantime, we suggest that the 25 % acetic acid leach might be better to estimate the bioavailable  
589 fraction given that Fe (and perhaps other TEs) associated with lithogenic particles are directly  
590 available to micro-organisms in productive regions and regions with high dust inputs (Rubin et al.,  
591 2011) and that aerosol particles can be processed by zooplankton (Schmidt et al., 2016).

592

#### 593 **4. Conclusions**

594 Aerosol TE solubility is usually determined using operationally-defined methods, while  
595 biogeochemical models require robust relationships between two or more parameters that can be used  
596 to predict TE solubility in order to constrain the bioavailable fraction of aerosol TEs. In this study, we  
597 used a two-stage leach (UHP water followed by 25 % acetic acid with hydroxylamine hydrochloride)  
598 to investigate the fractional solubility of a suite of trace elements (Al, Ti, Mn, Fe, Co, Ni, Cu, Zn, Cd,  
599 Pb) from aerosols collected in the North Atlantic during three GEOTRACES campaigns (GA03-2010,  
600 GA03-2011 and GA01). Five regions were identified based on air mass back trajectory (AMBT)  
601 simulations; i) North Africa, ii) Europe, iii) North America, iv) High Latitude, and v) Marine.  
602 However, the AMBTs were not able to sufficiently discriminate aerosol sources within these regions.  
603 Of these five categories, the North African aerosols were the most homogeneous in terms of their  
604 fractional solubility and elemental ratios. In contrast, samples from the most remote locations, the  
605 Marine and High Latitude aerosols, had the most spread in their fractional solubility and elemental  
606 ratios. Elemental ratios were discussed rather than enrichment factors since earlier work highlighted  
607 that the UCC ratios are not representative of the North African mineral dust end-member, which  
608 dominates aerosol supply in much of the study area.

609 We observed an inverse relationship between the fractional solubility of Al, Ti, Fe, Ni, Cu and Pb and  
610 aerosol loading for all leach media (UHP water, filtered seawater, and 25 % acetic acid). However,  
611 Mn, Zn and Cd fractional solubility appears to be independent of atmospheric loading. For Co, the  
612 inverse relationship between UHP water solubility and loading was not observed when using the 25 %  
613 acetic acid leach, most likely because Co may be associated with the Mn and Fe oxides that are easily  
614 reduced using the 25 % acetic acid leach. Further work is required to assess exactly which fraction is  
615 accessed by the various leach protocols in order to understand links between the soluble and  
616 bioavailable fractions.

617

#### 618 **Data availability**

619 Data is available at BCO-DMO (GA03; [www.bco-dmo.org](http://www.bco-dmo.org)) and LEFE-CYBER (GA01;  
620 ([www.obsvlfr.fr/proof/php/GEOVIDE/GEOVIDE.php](http://www.obsvlfr.fr/proof/php/GEOVIDE/GEOVIDE.php)), and on request from the lead author.

621 **Acknowledgements**

622 Many thanks to the captains and crews of the RV Knorr (GA03-2010 and 2011) and NO Pourquoi  
623 Pas? (GA01), the chief scientists (GA03 = Bob Anderson, Ed Boyle, Greg Cutter; GA01 = Geraldine  
624 Sarthou and Pascale Lherminier), Alex Baker for the loan of the aerosol sampler used on GA01, and  
625 Alina Ebling Petroc Shelley, Alex Landing and Sarah Huff for their help with sample processing and  
626 analysis. This work was supported by grants to WML (NSF-OCE 0752832, 0929919 and 1132766),  
627 and GS (ANR-13-B506-0014 and ANR-12-PDOC-0025-01). RUS was supported by a LabexMER  
628 International Postdoctoral Fellowship and CG29 Postdoctoral Fellowship. A portion of this work was  
629 performed at the National High Magnetic Field Laboratory, which is supported by National Science  
630 Foundation Cooperative Agreement No. DMR-1157490 and the State of Florida. The aerosol  
631 digestions for GA01 were undertaken in the geochemistry clean room at Ifremer (Centre de Bretagne).  
632 Trace element determination for GA01 was conducted at the Pôle de Spectrométrie Océan at the  
633 Institut Universitaire Européen de la Mer with the support and guidance of Claire Bollinger and  
634 Marie-Laure Rouget. Finally, we thank Karine Desbeoufs and an anonymous reviewer for their  
635 critiques that have contributed to the improvement of this manuscript.

636

637 **References**

- 638 Achterberg, E. P., Moore, C.M., Henson, S. A., Steigenberger, S., Stohl, A., Eckhardt, S., Avendano,  
639 LC., Cassidy, M., Hembury, D., Klar, J.K., Lucas, M.I., Macey, A.I., Marsay, C.M., and, Ryan-  
640 Keogh, T.J.: Natural iron fertilization by the Eyjafjallajökull volcanic eruption, *Geophys. Res. Lett.*,  
641 40, 921-926, <http://doi.org/10.1002/grl.50221>, 2013.
- 642 Adams, A. M., Prospero, J.M., and Zhang, C.: CALIPSO-Derived Three-Dimensional Structure of  
643 Aerosol over the Atlantic Basin and Adjacent Continents, *Journal of Climate*, 25, 6862-6879,  
644 <http://doi.org/10.1175/JCLI-D-11-00672.1>, 2012.
- 645 Aguilar-Islas, A. M., Wu, J., Rember, R., Johansen, A.M. and Shank, L. M.: Dissolution of aerosol-  
646 derived iron in seawater: Leach solution chemistry, aerosol type, and colloidal iron fraction, *Marine*  
647 *Chemistry*, 120, 25-33., 2010.
- 648 Arnalds, O.: Soils of Iceland, *Jökull*, 58, 409-421, 2004.
- 649 Baker, A. R., Adams, C., Bell, T.G., Jickells, T.D., and Ganzeveld, L.: Estimation of atmospheric  
650 nutrient inputs to the Atlantic Ocean from 50N to 50S based on large-scale filed sampling: Iron and  
651 other dust-associated elements, *Global Biogeochem. Cycles*, 27, 755-767,  
652 <http://doi.org/10.1002/gbc.20062>, 2013, 2013.
- 653 Baker, A. R., and, Croot, P. L.: Atmospheric and marine controls on aerosol iron solubility in  
654 seawater., *Marine Chemistry*., 120, 4-13, 2010.
- 655 Baker, A. R., and Jickells, T.D.: Mineral particle size as a control on aerosol iron solubility., *Geophys.*  
656 *Res. Lett.*, 33, <http://doi.org/10.1029/2006GL026557>, 2006.

657 Baker, A. R., and, Jickells, T.D.: Atmospheric deposition of soluble trace elements along the Atlantic  
658 Meridional Transect (AMT), *Progress in Oceanography*, 158, 41-51, 10.1016/j.pocean.2016.10.002,  
659 2017.

660 Baker, A. R., Jickells, T. D., Biswas, K. F., Weston, K., and French, M.: Nutrients in atmospheric  
661 aerosol particles along the Atlantic Meridional Transect, *Deep Sea Research Part II: Topical Studies in*  
662 *Oceanography*, 53, 1706-1719, 2006a.

663 Baker, A. R., Jickells, T. D., Witt, M., and Linge, K. L.: Trends in the solubility of iron, aluminium,  
664 manganese and phosphorus in aerosol collected over the Atlantic Ocean, *Marine Chemistry*, 98, 43-58,  
665 2006b.

666 Baker, A. R., Landing, W.M., Bucciarelli, E., Cheize, M., Fietz, S., Hayes, C.T., Kadko, D., Morton,  
667 P.L., Rogan, N., Sarthou, G., Shelley, R.U., Shi, Z., Shiller, A., and, van Hulten, M.M.P.: Trace  
668 element and isotope deposition across the air–sea interface: progress and research needs, *Philosophical*  
669 *Transactions of the Royal Society A: Mathematical, Physical and Engineering Sciences*, 374,  
670 <http://doi.org/10.1098/rsta.2016.0190>, 2016.

671 Baratoux, D., Mangold, N., Arnalds, O., Bardintzeff, J.-M., Platevoët, B., Grégoire, M., and Pinet, P.:  
672 Volcanic sands of Iceland - Diverse origins of aeolian sand deposits revealed at Dyngjúsandur and  
673 Lambahraun, *Earth Surf. Process. Landforms*, 36, 1789-1808, 10.1002/esp.2201, 2011.

674 Ben-Ami, Y., Koren, I., Rudich, Y., Artaxo, P., Martin, S.T., and Andreae, M.O.: Transport of North  
675 African dust from the Bodele depression to the Amazon Basin: a case study, *Atmos. Chem. Phys.*, 10,  
676 7533-7544, <http://doi.org/10.5194/acp-10-7533-2010>, 2010.

677 Berger, J. M., Lippiatt, S.M., Lawrence, M.G., and Bruland, K.W.: Application of a chemical leach  
678 technique for estimating labile particulate aluminum, iron, and manganese in the Columbia River  
679 plume and coastal waters off Oregon and Washington., *Journal of Geophysical Research*, 113,  
680 <http://doi.org/10.1029/2007JC004703>, 2008.

681 Bridgestock, L., Rehkämper, M., van de Flierdt, T., Murphy, K., Khondoker, R., Baker, A. R., Chance,  
682 R., Strekopytov, S., Humphreys-Williams, E., and Achterberg E.P.: The Cd isotope composition of  
683 atmospheric aerosols from the Tropical Atlantic Ocean, *Geophys. Res. Lett.*, 44, 2932-2940,  
684 <http://doi.org/10.1002/2017GL072748>, 2017.

685 Buck, C. S., Landing, W.M., and Resing, J.: Pacific Ocean aerosols: Deposition and solubility of iron,  
686 aluminum, and other trace elements, *Marine Chemistry*, 157, 117-130,  
687 <http://dx.doi.org/10.1016/j.marchem.2013.09.005>, 2013.

688 Buck, C. S., Landing, W.M., Resing, J. A., Lebon, G. T.: Aerosol iron and aluminum solubility in the  
689 northwest Pacific Ocean: Results from the 2002 IOC cruise, *Geochemistry, Geophysics, Geosystems.*,  
690 7, <http://doi.org/10.1029/2005GC000977>, 2006.

691 Buck, C. S., Landing, W.M., Resing, J.A. and Measures, C.I.: The solubility and deposition of aerosol  
692 Fe and other trace elements in the North Atlantic Ocean: Observations from the A16N CLIVAR/CO<sub>2</sub>  
693 repeat hydrography section., *Marine Chemistry.*, 120, 57-70, 2010.

694 Bullard, J. E., Baddock, M., Bradwell, T., Crusius, J., Darlington, E., Gaiero, D., Gassó, S.,  
695 Gisladottir, G., Hodgkins, R., McCulloch, R., McKenna-Neuman, C., Mockford, T., Stewart, H., and,

696 Thorsteinsson, T.: High-latitude dust in the Earth system, *Reviews of Geophysics*, 54, 447-485,  
697 <http://doi.org/10.1002/2016RG000518>, 2016.

698 Cheize, M., Sarthou, G., Croot, P., Bucciarelli, E., Baudoux, A.-C., and Baker, A.: Iron organic  
699 speciation determination in rainwater using cathodic stripping voltammetry, *Analytica Chimica Acta*,  
700 726, 45-54, 2012.

701 Chiapello, I., Bergametti, G., Chatenet, B., Bousquet, P., Dulac, F., and Soares, E. S.: Origins of  
702 African dust transported over the northeastern tropical Atlantic, *Journal of Geophysical Research:*  
703 *Atmospheres*, 102, 13701-13709, 10.1029/97jd00259, 1997.

704 Chueinta, W., Hopke, P. K., and Paatero, P.: Investigation of sources of atmospheric aerosol at urban  
705 and suburban residential areas in Thailand by positive matrix factorization, *Atmospheric Environment*,  
706 34, 3319-3329, [http://dx.doi.org/10.1016/S1352-2310\(99\)00433-1](http://dx.doi.org/10.1016/S1352-2310(99)00433-1), 2000.

707 Conway, T. M., and John, S.G.: Quantification of dissolved iron sources to the North Atlantic Ocean,  
708 *Nature*, 511, 212-215, <http://doi.org/10.1038/nature13482>. 2014.

709 Conway, T.M., Shelley, R.U., Aguilar-Islas, A.M., Landing, W.M., Mahowald, N.M., and John, S.G.:  
710 Iron isotopes reveal and important anthropogenic aerosol iron flux to the North Atlantic. Submitted to:  
711 *Nature Communications*.

712 de Leeuw, G., Guieu, C., Arneth, A., Bellouin, N., Bopp, L., Boyd, P.W., Denier van der Gon, H.A.C.,  
713 Desboeufs, K.V., Dulac, F., Facchini, M.C., Gantt, B., Langmann, B., Mahowald, N.M., Maranon, E.,  
714 O'Dowd, C., Olgun, N., Pulido-Villena, E., Rinaldi, M., Stephanou, E.G., and Wagener, T. : Ocean-  
715 atmosphere interactions of particles, in: *Ocean-atmosphere interactions of gases and particles*, edited  
716 by: Liss, P. S., and Johnson, M.T., Springer-Verlag, Berlin, 171-245, 2014.

717 Desboeufs, K. V., Sofikitis, A., Losno, R., Colin, J. L. and Ausset, P.: Dissolution and solubility of  
718 trace metals from natural and anthropogenic aerosol particulate matter., *Chemosphere*, 58, 195-203.,  
719 2005.

720 Doherty, O. M., Riemer, N., and Hameed, S.: Role of the convergence zone over West Africa in  
721 controlling Saharan mineral dust load and transport in the boreal summer, *Tellus B*, 66,  
722 <http://doi.org/10.3402/tellusb.v66.23191>, 2014.

723 Fishwick, M. P., Sedwick, P.N., Lohan, M.C., Worsfold, P.J., Buck, K.N., Church, T.M., and Ussher,  
724 S.J.: The impact of changing surface ocean conditions on the dissolution of aerosol iron, *Global*  
725 *Biogeochem. Cycles*, 28, 1235-1250, <http://doi.org/10.1002/2014GB 004921>, 2014.

726 Gelado-Caballero, M. D., López-García, P., Prieto, S., Patey, M.D., Collado, C., Hernández-Brito, J.J.:  
727 Long-term aerosol measurements in Gran Canaria, Canary Islands: Particle concentration, sources and  
728 elemental composition, *Journal of Geophysical Research: Atmospheres*, 117, D03304,  
729 <http://doi.org/10.1029/2011jd016646>, 2012.

730 GEOTRACES Planning Group, GEOTRACES Science Plan. Baltimore, Maryland:  
731 Scientific Committee on Oceanic Research, <http://www.geotraces.org/science/science-plan>, 2006.

732 Gledhill, M., and Buck, K. N.: The organic complexation of iron in the marine environment: a review,  
733 *Frontiers in Microbiology*, <https://doi.org/10.3389/fmicb.2012.00069>, 2012.

734 Hatta, M., Measures, C. I., Wu, J., Roshan, S., Fitzsimmons, J. N., Sedwick, P., and, and Morton, P.:  
 735 An overview of dissolved Fe and Mn Distributions during the 2010–2011 U.S. GEOTRACES north  
 736 Atlantic Cruises: GEOTRACES GA03, Deep Sea Research Part II: Topical Studies in Oceanography,  
 737 <http://dx.doi.org/10.1016/j.dsr2.2014.07.005>, 2015.

738 Helmers, E., and Schrems, O.: Wet deposition of metals to the tropical North and the South Atlantic  
 739 Ocean, *Atmospheric Environment*, 29, 2475-2484, 1995.

740 Jickells, T. D., Baker, A. R., and Chance, R.: Atmospheric transport of trace elements and nutrients to  
 741 the oceans, *Philosophical Transactions of the Royal Society A: Mathematical, Physical and*  
 742 *Engineering Sciences*, 374, <http://doi.org/10.1098/rsta.2015.0286>, 2016.

743 Jickells, T. D., An, Z.S., Andersen, K.K., Baker, A.R., Bergametti, G., Brooks, N., Cao, J.J., Boyd,  
 744 P.W., Duce, R.A., Hunter, K.A., Kawahata, H., Kubilay, N., laRoche, J., Liss, P.J., Mahowald, N.,  
 745 Prospero, J.M., Ridgwell, A.J., Tegen, I., and Torres, R.: Global iron connections between desert dust,  
 746 ocean biogeochemistry and climate., *Science*, 308, 67-71, 2005.

747 Johansen, A., Siefert, R.L., Hoffmann, M.R.: Chemical composition of aerosols collected over the  
 748 tropical North Atlantic Ocean, *Journal of Geophysical Research*, 105, 15277-15312, 2000.

749 Johnson, B. T., Osborne, S.R., Haywood, J.M., and Harrison, M.A.J.: Aircraft measurements of  
 750 biomass burning aerosol over West Africa during DABEX, *J. Geophys. Res.*, 113,  
 751 10.1029/2007JD009451, 2008.

752 Kim, G., Alleman, L.Y., and Church, T.M.: Atmospheric depositional fluxes of trace elements, <sup>210</sup>Pb,  
 753 and <sup>7</sup>Be to the Sargasso Sea, *Global Biogeochemical Cycles*, 13, <http://doi.org/10.1029/1999gb900071>, 1999.

755 Knippertz, P., Coe, H., Chiu, J. C., Evans, M.J., Fink, A.H., Kalthoff, N., Lioussé, C., Mari, C.,  
 756 Allan, R.P., Brooks, B., Danour, S., Flamant, C., Jegede, O.O., Lohou, F., and, Marsham, J.H.: The  
 757 DACCIIWA Project: Dynamics–Aerosol–Chemistry–Cloud Interactions in West Africa, *Bulletin of the*  
 758 *American Meteorological Society*, 96, 1451-1460, 10.1175/BAMS-D-14-00108.1, 2015.

759 Koçak, M., Kubilay, N., Herut, B., and Nimmo, M.: Trace Metal Solid State Speciation in Aerosols of  
 760 the Northern Levantine Basin, East Mediterranean, *Journal of Atmospheric Chemistry*, 56, 239-257,  
 761 <http://doi.org/10.1007/s10874-006-9053-7>, 2007.

762 Lafon, S., Sokolik, I. N., Rajot, J. L., Caqueneau, S. and Gaudichet, A.: Characterization of iron oxides  
 763 in mineral dust aerosols: Implications for light absorption, *J. Geophys. Res.*, 111,  
 764 10.1029/2005JD007016, 2006.

765 Laing, J. R., Hopke, P.K., Hopke, E.F., Husain, L., Dutkiewicz, V.A., Paatero, J., and Viisanen, Y.:  
 766 Positive Matrix Factorization of 47 Years of Particle Measurements in Finnish Arctic, *Aerosol and Air*  
 767 *Quality Research*, 15, 188-207, <http://doi.org/10.4209/aaqr.2014.04.0084>, 2015.

768 Landing, W.M., and Shelley, R.U.: Particle size effects on aerosol iron solubility from the U.S.  
 769 GEOTRACES North Atlantic Zonal Transect (2010, 2011), ASLO 2013 Aquatic Sciences Meeting,  
 770 2013.

771 Longhurst, A.: *Ecological Geography of the Sea.*, Academic Press., San Diego, 1998.

772 Longo, A. F., Feng, Y., Lai, B., Landing, W.M., Shelley, R.U., Nenes, A., Mihalopoulos, N., Violaki,  
773 K., and, Ingall, E.D.: Influence of Atmospheric Processes on the Solubility and Composition of Iron in  
774 Saharan Dust, *Environmental Science & Technology*, 50, 6912-6920,  
775 <http://doi.org/10.1021/acs.est.6b02605>, 2016.

776 Mackey, K. R. M., Chien, C.-T., Post, A.F., Saito, M.A., and Paytan, A.: Rapid and gradual modes of  
777 aerosol trace metal dissolution in seawater, *Frontiers in Microbiology*, 5, 1-11,  
778 <http://doi.org/10.3389/fmicb.2014.00794>, 2015.

779 Maring, H., Settle, D.M., Buat-Ménard, P., Dulac, F., and, Patterson, C.C.: Stable lead isotopes tracers  
780 of air mass trajectories in the Mediterranean region, *Nature*, 300, 154-156, 1987.

781 Marticorena, B., Chatenet, B., Rajot, J. L., Traoré, S., Coulibaly, M., Diallo, A., Koné, I., Maman, A.,  
782 Ndiaye, T., and Zakou, A.: Temporal variability of mineral dust concentrations over West Africa:  
783 analyses of a pluriannual monitoring from the AMMA Sahelian Dust Transect, *Atmos. Chem. Phys.*,  
784 10, 8899-8915, 10.5194/acp-10-8899-2010, 2010.

785 McConnell, C. L., Highwood, E.J., Coe, H., Formenti, P., Anderson, B., Osborne, S., Nava, S.,  
786 Desboeufs, K., Chen, G., and Harrison, M.A.J.: Seasonal variations of the physical and optical  
787 characteristics of Saharan dust: Results from the Dust Outflow and Deposition to the Ocean (DODO)  
788 experiment, *Journal of Geophysical Research: Atmospheres*, 113, D14S05, 10.1029/2007jd009606,  
789 2008.

790 Measures, C.I., and Brown E.T.: Estimating dust input to the Atlantic Ocean using surface water Al  
791 concentrations, in, *The Impact of desert dust across the Mediterranean*, edited by S. Guerzoni and R.  
792 Chester, pp.301-311, Kluwer: Dordrecht, 1996.

793 Menzel-Barraqueta, J.-L., Schlosser, C., Planquette, H., Gourain, A., Cheize, M., Boutorh, J., Shelley,  
794 R., Pereira Contreira, L., Gledhill, M., Hopwood, M.J., Lherminier, P., Sarthou, G. and Achterberg,  
795 E.P. Aluminium in the North Atlantic Ocean and the Labrador Sea (GEOTRACES GA01 section):  
796 roles of continental inputs and biogenic particle removal. *Biogeosciences Discuss.*,  
797 <https://doi.org/10.5194/bg-2018-39>, this issue.

798 Morton, P. L., Landing, W.M., Hsu, S.-C., Milne, A., Aguilar-Islas, A.M., Baker, A.R., Bowie, A.R.,  
799 Buck, C.S., Gao, Y., Gichuki, S., Hastings, M.G., Hatta, M., Johansen, A. M., Losno, R., Mead, C.,  
800 Patey, M.D., Swarr, G., Vandermark, A., Zamora, L.M.: Methods for the sampling and analysis of  
801 marine aerosols: results from the 2008 GEOTRACES aerosol intercalibration experiment, *Limnology*  
802 and *Oceanography: Methods*, 11, 62-78, 2013.

803 Oladottir, B. A., Sigmarsson, O., Larsen, G., and Devidal, J.L.: Provenance of basaltic tephra from  
804 Vatnajökull subglacial volcanos, iceland, as determined by major- and trace-element analyses, *The*  
805 *Holocene*, 21, 1037-1048, 10.1177/0959683611400456, 2011.

806 Patey, M. D., Achterberg, E.P., Rijkenberg, M.J., and Pearce, R.: Aerosol time-series measurements  
807 over the tropical Northeast Atlantic Ocean: Dust sources, elemental, composition and mineralogy,  
808 *Marine Chemistry*, 174, 103-119, <http://dx.doi.org/10.1016/j.marchem.2015.06.004>, 2015.

809 Petzold, A., Rasp, K., Weinzierl, B., Esselborn, M., Hamburger, T., Dörnbrack, A., Kandler, K.,  
810 Schütz, L., Knippertz, P., Fiebig, M., and Virkkula, A.: Saharan dust absorption and refractive index  
811 from aircraft-based observations during SAMUM 2006, *Tellus B*, 61, 118-130, 10.1111/j.1600-  
812 0889.2008.00383.x, 2009.

813 Planquette, H., Gourain, A., Cheize, M., Menzel Barraqueta, J.L., Boutorh, J., Shelley, R., Pereira  
814 Contreira, L., Lacan, F., Lherminier, P. and Sarthou, G. Particulate trace elements in the North  
815 Atlantic along the GEOVIDE section (GEOTRACES GA01), ASLO 2016 Ocean Sciences Meeting,  
816 2016.

817 Powell, C. F., Baker, A.R., Jickells, T.D., Bange, H.W., Chance, R.J., Yodle, C.: Estimation of the  
818 atmospheric flux of nutrients and trace metals to the eastern tropical North Atlantic Ocean, *Journal of*  
819 *the Atmospheric Sciences*, 4029-4045, <http://doi.org/10.1175/JAS-D-15-0011.1>, 2015.

820 Prospero, J. M., Bullard, J.E., and Hodgkins, R.: High-Latitude Dust Over the North Atlantic: Inputs  
821 from Icelandic Proglacial Dust Storms, *Science*, 335, 1078-1082,  
822 <http://doi.org/10.1126/science.1217447>, 2012.

823 Prospero, J. M., Ginoux, P., Torres, O., Nicholson, S.E. and Thomas, T.E.: Environmental  
824 characterization of global sources of atmospheric dust identified with the Nimbus 7 Total Ozone  
825 Mapping Spectrometer (TOMS) absorbing aerosol product., *Reviews of Geophysics.*, 40,  
826 10.1029/2000RG000095, 2002.

827 Prospero, J. M., Glaccum, R.A. and Nees, R.T.: Atmospheric transport of soil dust from Africa to  
828 South America., *Nature.*, 289, 570-572., 570-572., 1981.

829 R Core Team: R: A Language and Environment for Statistical Computing. [https://www.R-](https://www.R-project.org/)  
830 [project.org.](https://www.R-project.org/), 2016.

831 Rolph, G.D., Real-time Environmental Applications and Display sYstem (READY) Website  
832 (<http://ready.arl.noaa.gov>). NOAA Air Resources Laboratory, Silver Spring, MD, 2017. Rubin, M.,  
833 Berman-Frank, I., and Shaked, Y.: Dust- and mineral-iron utilization by the marine dinitrogen-fixer  
834 *Trichodesmium*, *Nature Geosci*, 4, 529-534, 2011.

835 Rudnick, R. L., and Gao, S.: Composition of the continental crust, in: *Treatise on Geochemistry*,  
836 edited by: Holland, H. D., and Turekian, K.K., Elsevier, Oxford, 1-64, [http://dx.doi.org/10.1016/B0-](http://dx.doi.org/10.1016/B0-08-043751-6/03016-42003)  
837 [08-043751-6/03016-42003](http://dx.doi.org/10.1016/B0-08-043751-6/03016-42003).

838 Rue, E. L., and Bruland, K. W. : Complexation of iron (III) by natural organic ligands in the Central  
839 North Pacific as determined by a new competitive ligand equilibrium/ adsorptive cathodic stripping  
840 voltammetric method, *Marine Chemistry*, 50, 117-138, 1995.

841 Sarthou, G., Baker, A.R., Blain, S., Achterberg, E.P., Boye, M., Bowie, A.R., Croot, P., Laan, P., de  
842 Baar, H.J. W., Jickells, T.D. and Worsfold, P.J.: Atmospheric iron deposition and sea-surface  
843 dissolved iron concentrations in the eastern Atlantic Ocean., *Deep Sea Research Part I: Oceanographic*  
844 *Research Papers.*, 50, 1339-1352., 2003.

845 Scheuvens, D., Schütz, L., Kandler, K., Ebert, M., and Weinbruch, S.: Bulk composition of northern  
846 African dust and its source sediments — A compilation, *Earth-Science Reviews*, 116, 170-194,  
847 <http://dx.doi.org/10.1016/j.earscirev.2012.08.005>, 2013.

848 Schmidt, K., Schlosser, C., Atkinson, A., Fielding, S., Venables, H.J., Waluda, C.M., and Achterberg,  
849 E.P.: Zooplankton gut passage mobilizes lithogenic iron for ocean productivity, *Current Biology*, 26,  
850 2667-2673, <https://doi.org/10.1016/j.cub.2016.07.058>, 2016.

851 Sedwick, P. N., Sholkovitz, E.R. and Church, T.M.: Impact of anthropogenic combustion emissions on  
852 the fractional solubility of aerosol iron: evidence from the Sargasso Sea., *Geochemistry, Geophysics,*  
853 *Geosystems.*, 8, <http://doi.org/10.1029/2007GC001586>, 2007.



854 Sippula, O., Stengel, B., Sklorz, M., Streibel, T., Rabe, R., Orasche, J., Lintelmann, J., Michalke, B.,  
855 Abbaszade, G., Radischat, C., Gröger, T., Schnelle-Kreis, J., Harndorf, H., and Zimmermann, R.:  
856 Particle Emissions from a Marine Engine: Chemical Composition and Aromatic Emission Profiles  
857 under Various Operating Conditions, *Environmental Science & Technology*, 48, 11721-11729,  
858 10.1021/es502484z, 2014.

859 Shaked, Y., and Lis, H.: Dissassembling iron availability to phytoplankton, *Frontiers in Microbiology*,  
860 3, <http://doi.org/10.3389/fmicb.2012.00123>, 2012.

861 Shelley, R. U., Morton, P.L. and Landing, W.M.: Elemental ratios and enrichment factors in aerosols  
862 from the US-GEOTRACES North Atlantic transects, *Deep Sea Research Part II: Topical Studies in*  
863 *Oceanography*, 116, 262-272, <http://dx.doi.org/10.1016/j.dsr2.2014.12.005>, 2015.

864 Shelley, R. U., Roca-Martí, M., Castrillejo, M., Sanial, V., Masqué, P., Landing, W.M., van Beek, P.,  
865 Planquette, H., and Sarthou, G.: Quantification of trace element atmospheric deposition fluxes to the  
866 Atlantic Ocean (> 40°N; GEOVIDE, GEOTRACES GA01) during spring 2014, *Deep Sea Research*  
867 *Part I: Oceanographic Research Papers*, 119, 34-49, <http://doi.org/10.1016/j.dsr.2016.11.010>, 2017.

868 Sholkovitz, E., R., Sedwick, P.N. and Church, T.M.: Influence of anthropogenic combustion emissions  
869 on the deposition of soluble aerosol iron to the ocean: Empirical estimates for island sites in the North  
870 Atlantic., *Geochimica et Cosmochimica Acta.*, 73, 3981-4003., 2009.

871 Sholkovitz, E., R., Sedwick, P.N., Church, T.M., Baker, A.R., and Powell, C.F.: Fractional solubility  
872 of aerosol iron: Synthesis of a global-scale data set, *Geochimica et Cosmochimica Acta*, 89, 173-189,  
873 2012.

874 Skonieczny, C., Bory, A. Bout-Roumazeilles, V., Abouchami, W., Galer, S. J. G., Crosta, X. Stuut,  
875 J.-B., I. Meyer, Chiapello, I., Podvin, T., Chatenet, B., Diallo, A., and Ndiaye, T.: The 7–13 March  
876 2006 major Saharan outbreak: Multiproxy characterization of mineral dust deposited on the West  
877 African margin, *Journal of Geophysical Research*, 116, <http://doi.org/10.1029/2011JD016173>, 2011.

878 Stein, A.F., Draxler, R.R., Rolph, G.D., Stunder, B.J.B., Cohen, M.D., and Ngan, F.: NOAA's  
879 HYSPLIT atmospheric transport and dispersion modeling system, *Bull. Amer. Meteor. Soc.*, 96, 2059-  
880 2077, <http://doi.org/10.1175/BAMS-D-14-00110.1>, 2015.

881 Tonnard, M., Planquette, H., Bowie, A.R., van der Merwe, P., Gallinari, M., Desprez de Gésincourt,  
882 F., Germain, Y., Gourain, A., Benetti, M., Reverdin, G., Treguer, P., Boutorh, J., Cheize, M., Menzel-  
883 Barraqueta, J.L., Pereira-Contreira, L., Shelley, R., Lherminier, P., and Sarthou, G. Dissolved iron in  
884 the North Atlantic Ocean and Labrador Sea along the GEOVIDE section (GEOTRACES section  
885 GA01), Submitted to *Biogeosciences Discuss.*, this issue.

886 Ussher, S. J., Achterberg, E.P., Powell, C., Baker, A.R., Jickells, T.D., Torres, R., and Worsfold, P.J.:  
887 Impact of atmospheric deposition on the contrasting iron biogeochemistry of the North and South  
888 Atlantic Ocean, *Global Biogeochemical Cycles*, 27, 1096-1107, <http://doi.org/10.1002/gbc.20056>,  
889 2013.

890 Weber, R. J., Guo, H., Russell, A.G., and Nenes, A.: High aerosol acidity despite declining  
891 atmospheric sulfate concentrations over the past 15 years, *Nature Geosci*, 9, 282-285,  
892 <http://doi.org/10.1038/ngeo2665>

893 Wozniak, A. S., Shelley, R.U., McElhenie, S.D., Landing, W.M., and Hatcher, P.G.: Aerosol water  
894 soluble organic matter characteristics over the North Atlantic Ocean: Implications for iron-binding  
895 ligands and iron solubility, *Marine Chemistry*, 173, 162-172,  
896 <http://dx.doi.org/10.1016/j.marchem.2014.11.002>, 2015.

897 Wozniak, A. S., Shelley, R.U., Sleighter, R.L., Abdulla, H.A.N., Morton, P.L., Landing, W.M., and  
898 Hatcher, P.G.: Relationships among aerosol water soluble organic matter, iron and aluminum in  
899 European, North African, and Marine air masses from the 2010 US GEOTRACES cruise, *Marine*  
900 *Chemistry*, 154, 24-33, <http://dx.doi.org/10.1016/j.marchem.2013.04.011>, 2013.

901 Wozniak, A. S., Willoughby, A. S., Gurganus, S. C., and Hatcher, P. G.: Distinguishing molecular  
902 characteristics of aerosol water soluble organic matter from the 2011 trans-North Atlantic US  
903 GEOTRACES cruise, *Atmos. Chem. Phys.*, 14, 8419-8434, 10.5194/acp-14-8419-2014, 2014.

904 Zurbrick, C., Boyle, E., Kayser, R., Reuer, M., Wu, J., Planquette, H., Shelley, R., Boutorh, J., Cheize,  
905 M., Contreira, L., Menzel, J.L. and Sarthou, G. Dissolved Pb and Pb isotopes in the North Atlantic  
906 from the GEOVIDE transect (GEOTRACES GA-01) and heir decadal evolution. *Biogeosciences*  
907 *Discuss*, <https://doi.org/10.5194/bg-2018-29>.

908  
909  
910  
911  
912  
913  
914

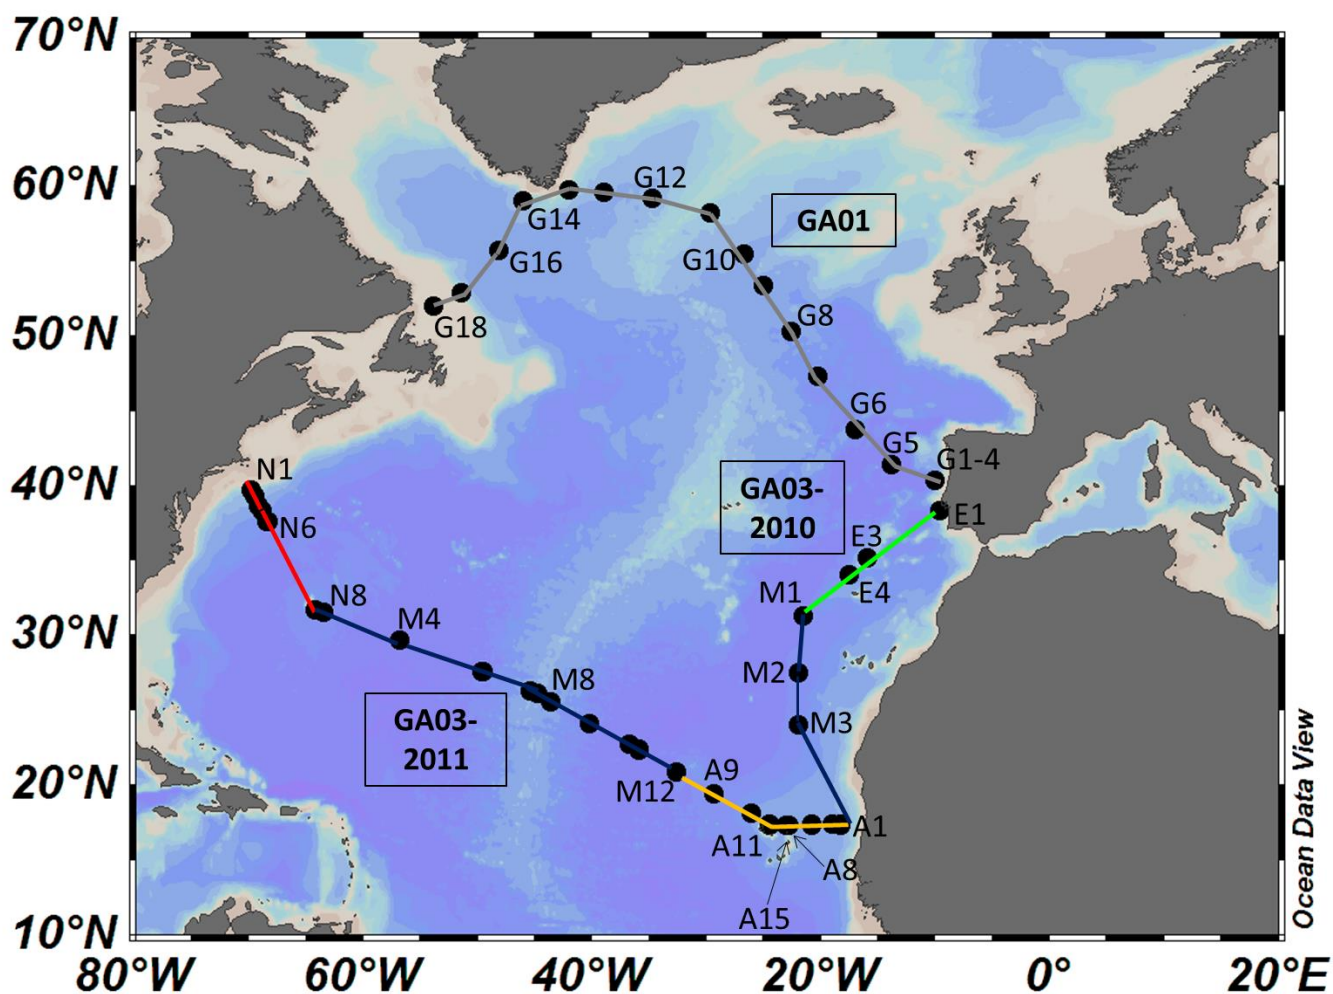

Figure 1

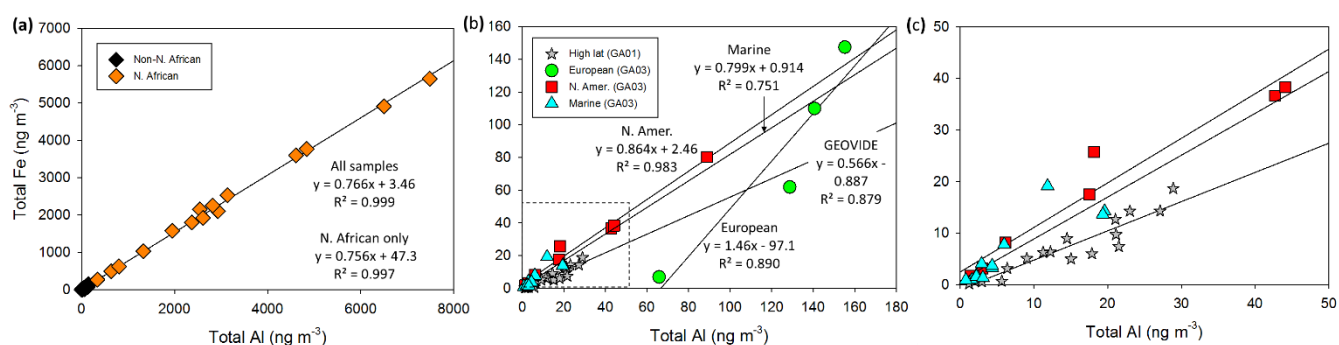

Figure 2

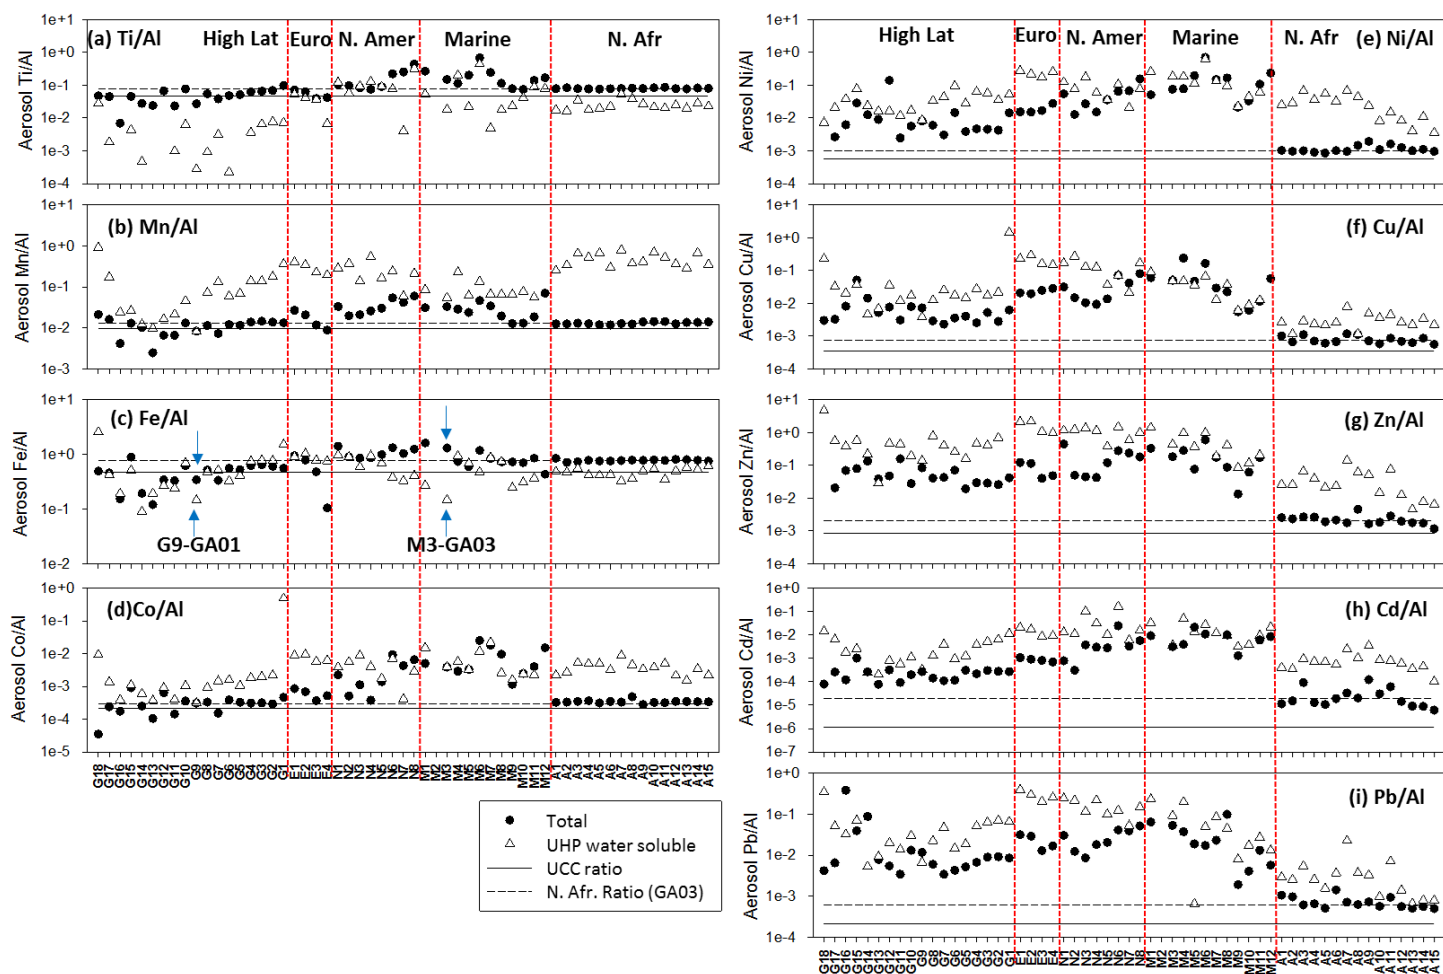

Figure 3

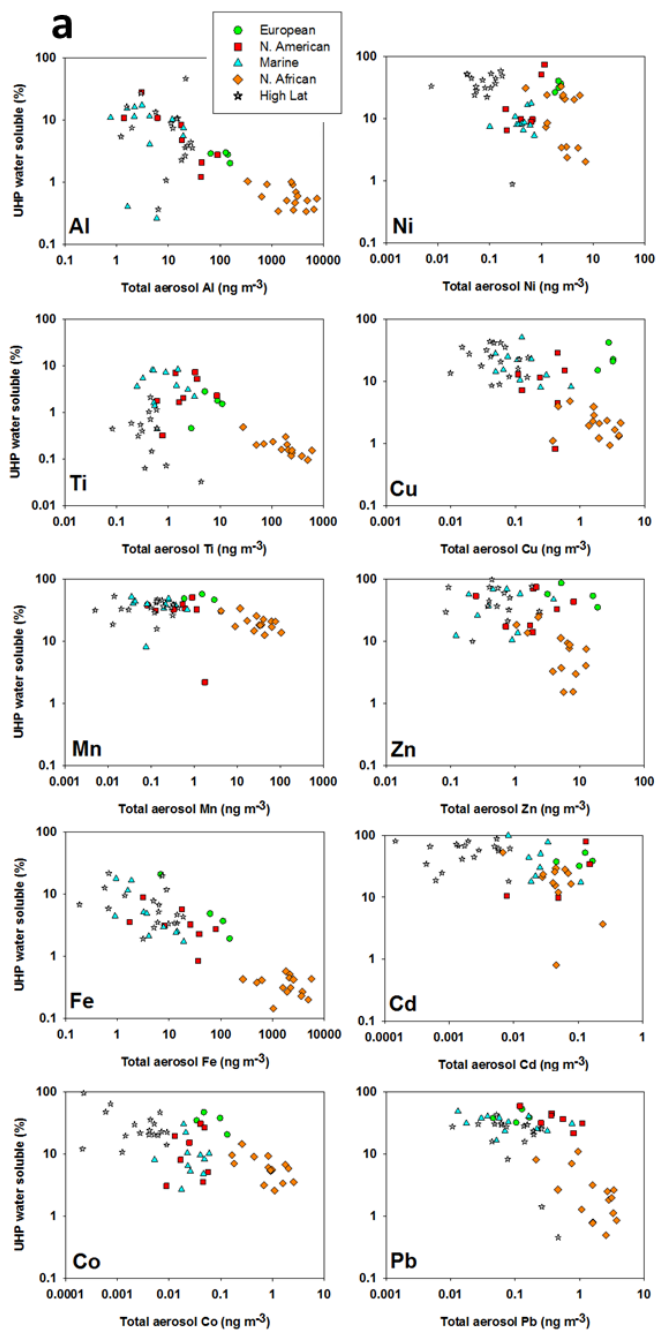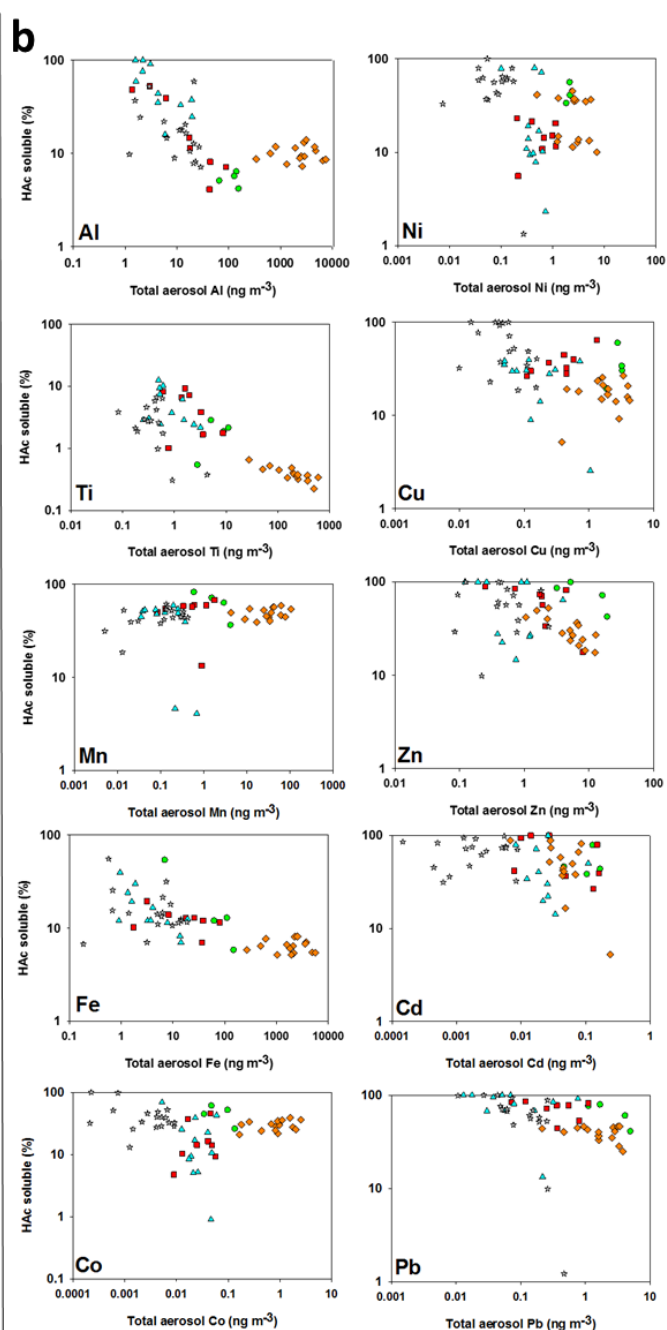

**Figure 4**

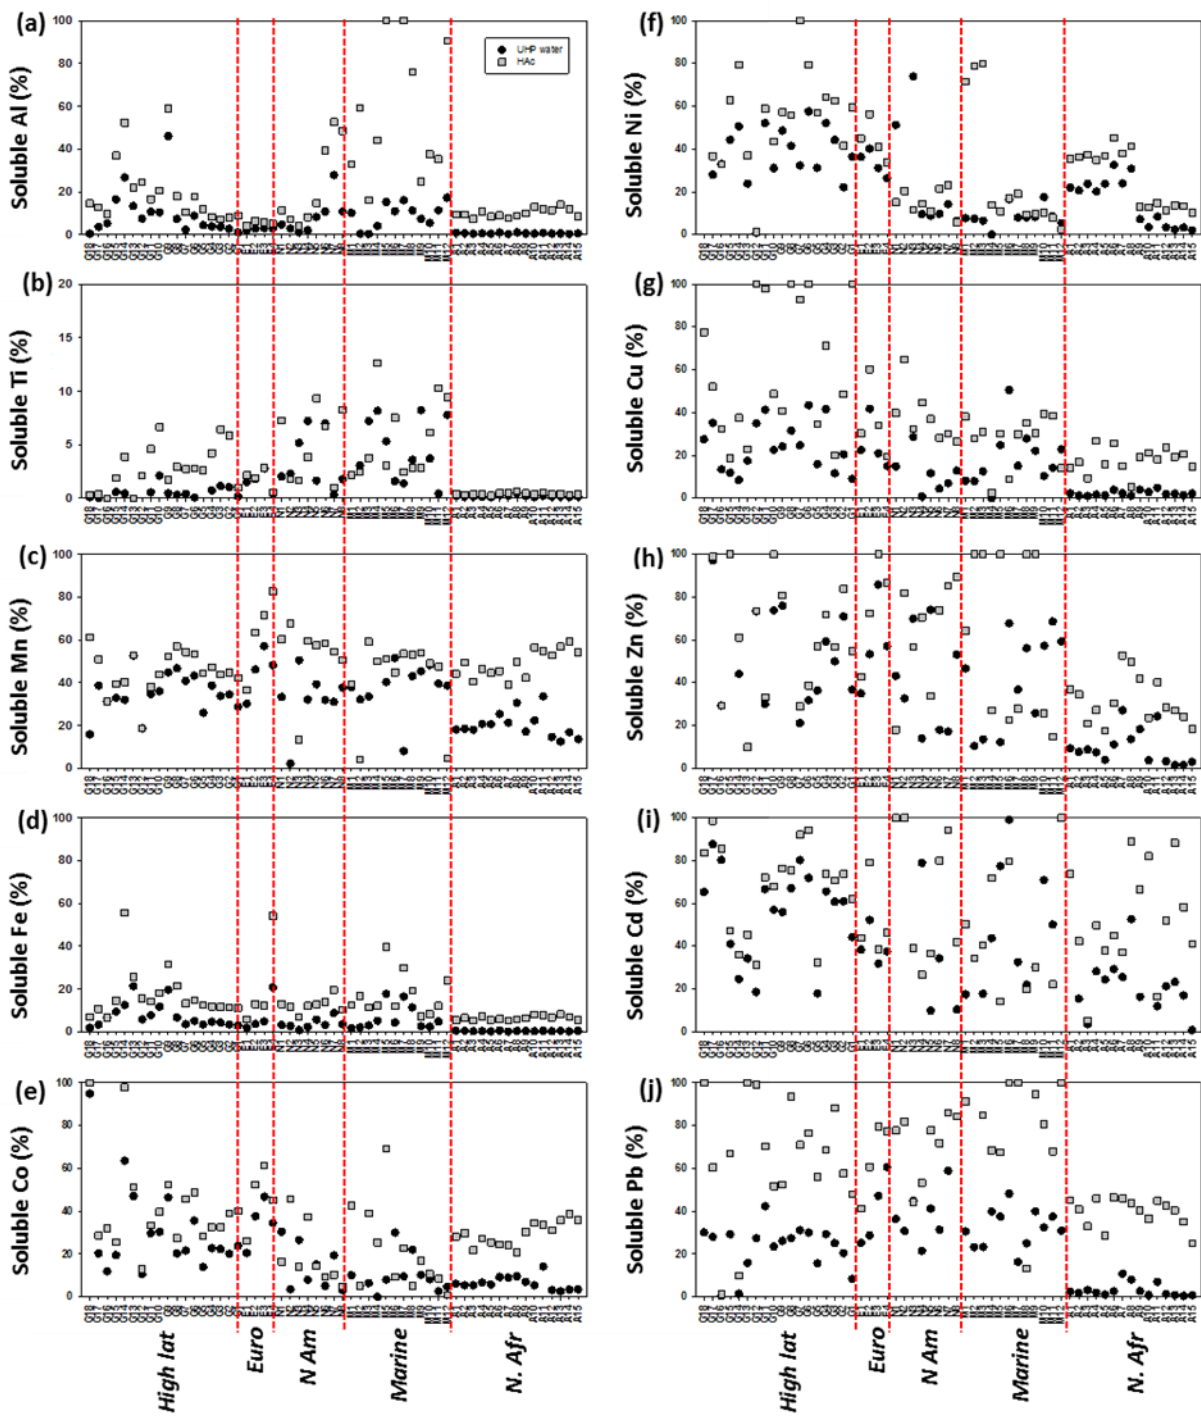

943

944 **Figure 5**

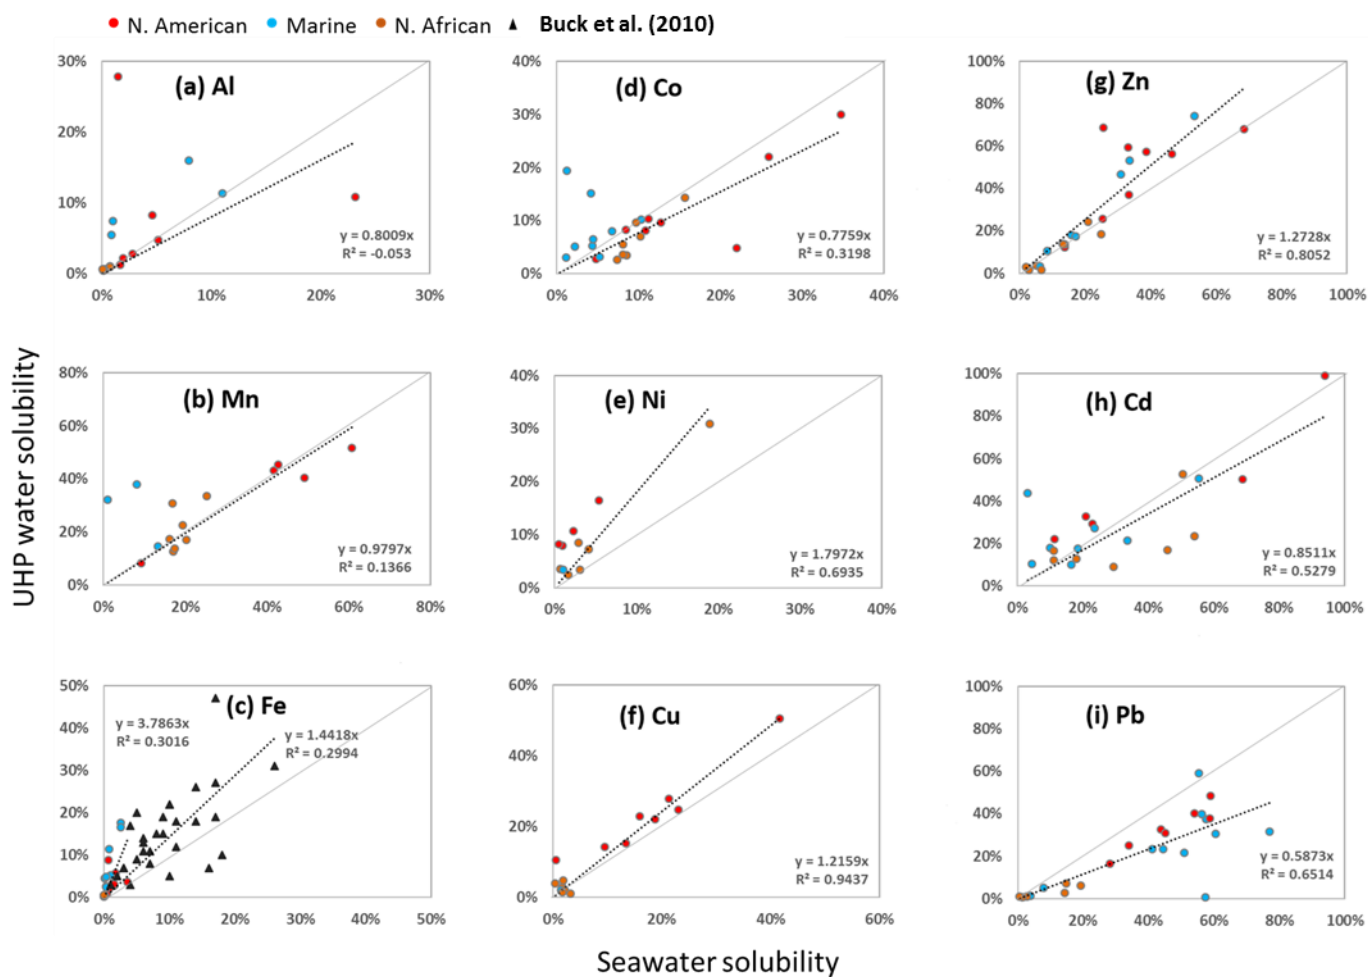

**Figure 6**

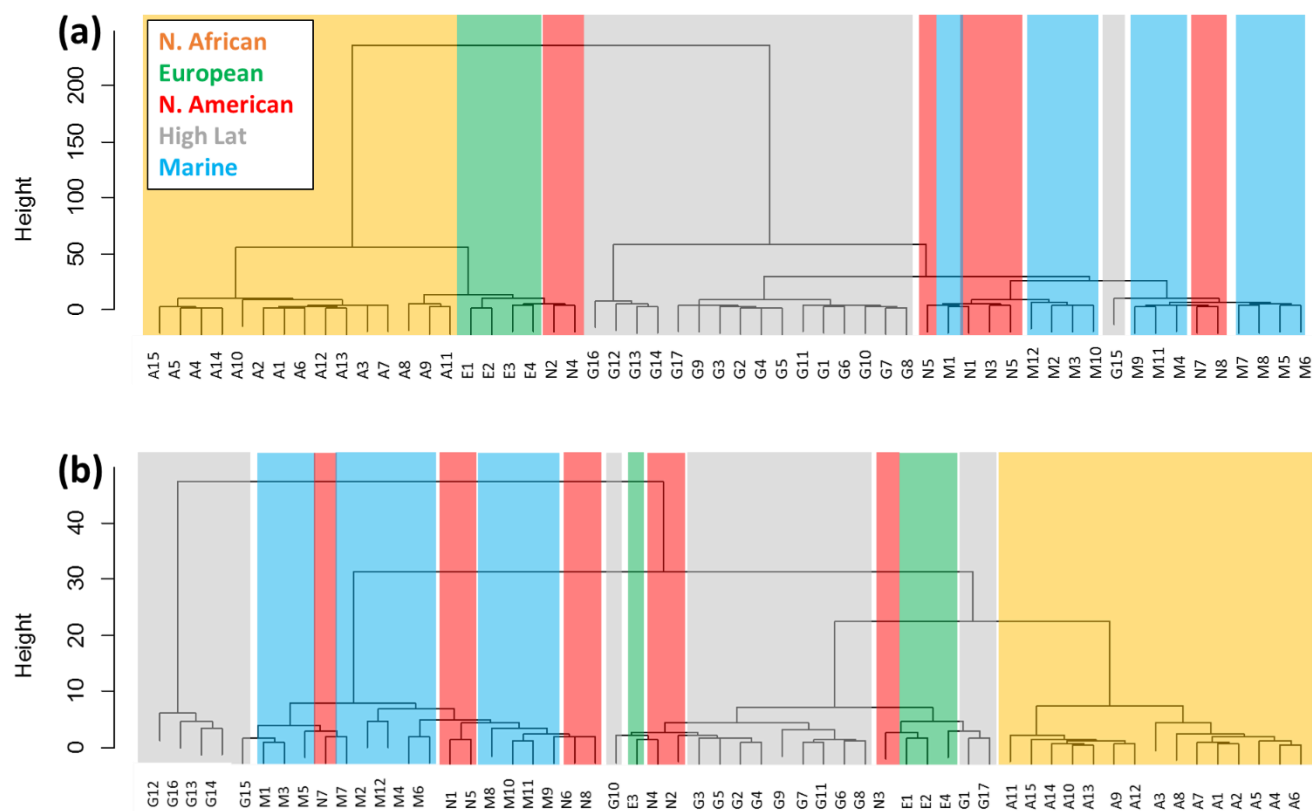

**Figure 7**

**Table 1**

|    | N. Amer. | Marine | N. Afr. |
|----|----------|--------|---------|
| Al | x        | x      | x       |
| Mn | x        | NA     |         |
| Fe |          |        | x       |
| Co | x        | x      |         |
| Ni |          | NA     | x       |
| Cu |          | NA     | x       |
| Zn | x        | x      | x       |
| Cd |          |        | x       |
| Pb |          |        |         |



## Captions: Figures

Figure 1. The GEOTRACES GA01 and GA03 cruise tracks (GA01, GA03-2010 and GA03-2011). In total, 57 aerosol samples (GA01 n = 18, GA03 n = 39; black dots) were collected. The samples are grouped by aerosol source region (green = European (E1-4), blue = Marine (M1-12), yellow = North African (A1-15), red = North American (N1-8), and grey = High Latitude (G1-18)), identified from air mass back trajectory simulations using the NOAA ARL model, HYSPLIT (Stein et al., 2015; Rolph, 2017). Note that a different labelling convention was used in Shelley et al. (2017) to refer to the GA01 samples. Here we use G1-18 to refer to the samples collected during GA01 (A1-18 in Shelley et al., 2017), and A1-15 to refer to the North African samples from GA03.

Figure 2. Total aerosol Fe and Al ( $\text{ng m}^{-3}$ ) for: (a) all aerosol samples from cruises GA01 and GA03, (b) samples from sources other than North Africa (i.e. the black diamonds in Fig. 2a), and (c) the samples inside the dashed box in Fig. 2b. For High Latitude dust n = 18, European samples n = 4, North American samples n = 8, Marine samples n = 12, and Saharan samples n = 15. Note error bars (standard deviations shown in Table S1) are not included so as not to obscure the symbols.

Figure 3. Elemental mass ratios (normalised to Al) of total (black circles) and UHP water soluble (white triangles) TEs. The UCC elemental ratio (Rudnick and Gao, 2003) is indicated by the solid horizontal line, and the elemental ratio in North African sourced aerosols (Shelley et al., 2015) is indicated by the dashed horizontal line on each plot. The red vertical lines separate the aerosol source regions, which are labelled in panel (a). Samples G9-GA01 and M3-GA03 are indicated by blue arrows in panel c (see text for details).

Figure 4. (a) Percentage of UHP water soluble TEs versus total aerosol TE ( $\text{ng m}^{-3}$ ), (b) percentage of 25 % acetic acid soluble TE versus total aerosol TE ( $\text{ng m}^{-3}$ ). Data is plotted on log-log scales.

Figure 5. Solubility of Al, Ti, Mn, Fe, Co, Ni, Cu, Zn, Cd, Pb following a UHP water leach (UHP water, black circles, calculated using Eq. 1), and a sequential leach of 25 % acetic acid (HAc, grey squares, calculated using Eq. 2). The red vertical dashed lines represent the different aerosol source categories, as labelled in panel (b). Note that Ti (panel b) is highly insoluble and has a maximum value of <13%.

Figure 6. Comparison of TE solubility following instantaneous leaches using UHP water or locally-collected, filtered seawater. The solid line is the 1:1 line. Where fewer data are observed, concentrations were below detection for one or both of the two leaches. The data for soluble aerosol Fe from within our study region from Buck et al. (2010) are plotted as black triangles in panel (c).

Figure 7. Hierarchical cluster analysis of (a) log transformed total TE concentration data plus  $\text{NO}_3^-$ , and (b) log transformed fractional solubility following the two-step sequential leach (fractional solubility calculated using Eq. 2). The coloured blocks correspond with the aerosol source regions shown in the legend.

## Captions: Tables

Table 1. Slopes that did not differ significantly from 1.0 at the 95 % confidence levels for the UHP water versus seawater instantaneous leaches are marked with x. NA = not assessed due to the number of paired samples being  $\leq 3$ .
